# Supplementary material for: Drugging an undruggable pocket on KRAS
Source: PubMed Central journal article supplement (PMC6689897; doi:10.1073/pnas.1904529116), 2019-07-22
Supplement: pnas.1904529116.sapp.pdf [file pnas.1904529116.sapp.pdf]

1  
2  
3  
4  
5  
6  
7  
8  
9  
10  
11  
12  
13  
14  
15  
16  
17  
18  
19  
20  
21  
22  
23  
24  
25  
26  
27  
28  
29  
30  
31  
32  
33

## Supplementary Information for

### Drugging an undruggable pocket on KRAS

Dirk Kessler<sup>a,1</sup>, Michael Gmachl<sup>a,1</sup>, Andreas Mantoulidis<sup>a,1</sup>, Laetitia J Martin<sup>a,1</sup>, Andreas Zoephel<sup>a</sup>, Moriz Mayer<sup>a</sup>, Andreas Gollner<sup>a</sup>, David Covini<sup>a</sup>, Silke Fischer<sup>a</sup>, Thomas Gerstberger<sup>a</sup>, Teresa Gmaschitz<sup>a</sup>, Craig Goodwin<sup>c</sup>, Peter Greb<sup>a</sup>, Daniela Häring<sup>a</sup>, Wolfgang Hela<sup>a</sup>, Johann Hoffmann<sup>a</sup>, Lyne Lamarre<sup>a</sup>, Jale Karolyi-Oezguer<sup>a</sup>, Petr Knesl<sup>a</sup>, Stefan Kornigg<sup>a</sup>, Manfred Koegl<sup>a</sup>, Roland Kousek<sup>a</sup>, Franziska Moser<sup>b</sup>, Silvia Munico-Martinez<sup>a</sup>, Christoph Peinsipp<sup>a</sup>, Jason Phan<sup>c</sup>, Jörg Rinnenthal<sup>a</sup>, Jiqing Sai<sup>c</sup>, Christian Salamon<sup>a</sup>, Yvonne Scherbantin<sup>a</sup>, Katharina Schipany<sup>a</sup>, Renate Schnitzer<sup>a</sup>, Andreas Schrenk<sup>a</sup>, Bernadette Sharps<sup>a</sup>, Gabriella Siszler<sup>a</sup>, Qi Sun<sup>c</sup>, Alex Waterson<sup>c</sup>, Bernhard Wolkerstorfer<sup>a</sup>, Markus Zeeb<sup>b</sup>, Mark Pearson<sup>a</sup>, Stephen W. Fesik<sup>c</sup> and Darryl B. McConnell<sup>a,2</sup>

Darryl B. McConnell  
Email: darryl.mcconnell@boehringer-ingenelheim.com

#### **This PDF file includes:**

- Supplementary text
- Figures S1 to S6
- Tables S1 to S7
- References for SI reference citations
- Author contributions

## 34 **Supplementary Text**

### 35 Microscale Thermophoresis (MST)

36 MST experiments were performed with a modified and fully automated Monolith  
37 NT.015 (NanoTemper Technologies, Munich, Germany). In collaboration with  
38 Nanotemper Technologies the in-house implementation combined the MST device with a  
39 Hamilton Microlab Star pipetting system (Hamilton Robotics, Bonaduz, Switzerland)  
40 equipped with an in-house developed tilting station. Each capillary was filled by dipping  
41 into each well of the vertically tilted 384-well plate (Greiner PP, small volume, deep well  
42 from Greiner Bio-One, Frickenhausen, Germany) using a pneumatic gripper (Schunk,  
43 Lauffen/Neckar, Germany), which was attached to a pipetting channel. Capillaries were  
44 individually transferred to a capillary holder. The latter with the set of 16 capillaries was  
45 then loaded on the capillary tray of the instrument and subsequent data acquisition.

46 Fluorescence labeling of GCP-KRAS<sup>G12D</sup> with the NT647 dye was carried out  
47 according to the manufacturer's protocol of the Monolith NT.115 Protein Labeling Kit  
48 RED-NHS (NanoTemper Technologies, Munich, Germany). Assay development  
49 comprised the optimization of protein concentration, buffer conditions, MST capillaries  
50 as well as the strength of the temperature gradient (IR laser power) using an in-house  
51 positive control to achieve a reliably detectable change in the thermophoretic mobility  
52 ( $\Delta F_{\text{norm}}$ ). Fragments were diluted in 30  $\mu\text{L}$  assay buffer (20 mM HEPES pH 7.4, 150 mM  
53 NaCl, 2 mM MgCl<sub>2</sub>, 1 mM TCEP, 0.05% Tween-20) with a Hamilton Microlab Star  
54 liquid handling system and 10  $\mu\text{L}$  of labeled GCP-KRAS<sup>G12D</sup> was added just-in-time  
55 prior to data acquisition to achieve equal incubation times. Final concentrations were 100  
56 nM fluorescently labeled GCP-KRAS<sup>G12D</sup>, 500  $\mu\text{M}$  fragment and 2% DMSO. Standard  
57 treated capillaries, IR laser powers of 20% and 70% (30s laser on time) and a LED  
58 intensity of 50% were used. (1) Capillary positions 1 and 16 were used as DMSO negative  
59 controls, whereas capillaries 2-14 contained seven fragments in duplicates. Data was  
60 analyzed with the NanoTemper Analysis software version 1.2.205 from which  $\Delta F_{\text{norm}}$   
61 values ( $\Delta F_{\text{norm}} = F_{\text{hot}}/F_{\text{cold}}$ ) as well as the initial fluorescence was exported. All MST traces  
62 were inspected manually and irregular traces (e.g. fluorescence quenching, protein  
63 aggregation) were discarded. Mean values of duplicates were calculated and compared to  
64 either the mean value of the DMSO negative control in the individual acquisition cycle or  
65 the mean value of the DMSO control of the respective 384-well screening plate. Integrity  
66 of labeled GCP-KRAS<sup>G12D</sup> throughout screening was monitored by the same positive  
67 control as used for assay development. Fragments were classified as hits if  $\Delta\Delta F_{\text{norm}} \geq$   
68  $\Delta F_{\text{norm}}(2\text{sd DMSO})$  with  $\Delta\Delta F_{\text{norm}} = |\Delta F_{\text{norm}}(\text{compound}) - \Delta F_{\text{norm}}(\text{DMSO})|$ .

### 70 NMR spectroscopy

71 STD-NMR experiments were carried out on a Bruker Avance II 600 MHz  
72 instrument equipped with a QCI cryogenic probe and z-gradients. Samples were freshly  
73 prepared just-in-time and NMR sample tubes were filled with an in-house customized  
74 Tecan Freedom Evo liquid handler. Transfer of the samples (140  $\mu\text{L}$  in 2.5 mm NMR  
75 tubes) to the NMR magnet was achieved with the Bruker Sample Rail system. For the  
76 STD experiment, a Gaussian pulse train was used for selective irradiation (duration of 3  
77 s) at -0.2 ppm (on-resonance spectrum) or at 60 ppm (off-resonance spectrum),  
78 respectively. Protein signals were suppressed by a 30 ms spin-lock pulse. Both spectra  
79 were recorded in an interleaved mode and subtracted after acquisition to yield the

80 difference spectrum. Mixtures of four fragments (each at 250  $\mu\text{M}$ ) were incubated in 25  
81 mM Tris-d11, 100 mM NaCl, 2 mM  $\text{MgCl}_2$ , 0.5 mM TCEP pH 7.4 in  $\text{D}_2\text{O}$  at 298K with  
82 a mixture of GCP-KRAS<sup>G12D</sup> and GDP-KRAS<sup>G12V</sup> (each 4  $\mu\text{M}$ ). Binders were identified  
83 by comparing pre-recorded reference spectra with the STD difference spectrum.

84 Deconvolution and confirmation of primary FBS hits obtained from STD-NMR and  
85 MST was performed using 2D  $^1\text{H}/^{15}\text{N}$  TROSY NMR experiments(2) collected on a  
86 Bruker Avance III 600 MHz spectrometer equipped with a 5 mm z-gradient TCI cryo-  
87 probe. Samples were prepared directly before data acquisition using a Tecan Freedom  
88 Evo pipetting system and delivered by a Bruker Sample Rail to the magnet. Each sample  
89 contained either 50  $\mu\text{M}$   $^{15}\text{N}$  labeled GDP-KRAS<sup>G12D</sup> or GCP-KRAS<sup>G12D</sup> in 25 mM Tris-  
90 d11, 100 mM NaCl, 2 mM  $\text{MgCl}_2$ , 0.5 mM TCEP pH 7.4 and 8% (v/v)  $\text{D}_2\text{O}$ . Proteins  
91 were incubated with 500  $\mu\text{M}$  fragment in a 2.5 mm NMR tube at 298K and 1%  
92  $\text{d}_6\text{DMSO}$ . Spectra were recorded with 32 transients and 64 data points in the indirect  
93 dimension. Processing and analysis were accomplished with Topspin 3.0 (Bruker  
94 BioSpin). Binders were identified by manual comparison of spectra in the presence of a  
95 fragment and the respective reference spectrum. All confirmed binders to  $^{15}\text{N}$  labeled  
96 GDP-KRAS<sup>G12D</sup> show also chemical shift perturbations in the presence of  $^{15}\text{N}$  labeled  
97 GDP-KRAS<sup>G12V</sup> and are therefore non-selective.

98 Measurement of dissociation constants  $K_D$  for the compounds synthesized. NMR  
99 was initially the only method that could provide  $K_D$ s for the weakly binding molecules to  
100 support compound optimization.  $^1\text{H}/^{15}\text{N}$  SoFast HMQC experiments(3) were recorded in  
101 3mm NMR tubes (170 $\mu\text{L}$  filling) at a protein concentration of 70-100 $\mu\text{M}$ . Spectra were  
102 recorded on a Avance III 700MHz spectrometer equipped with a cryogenically cooled  
103 5mm TCI probe and 48 scans, 128 f1 increments and 2k data points in f2. Total  
104 acquisition time was 22 minutes. 4 – 6 titration points were performed with individual  
105 samples for each titration point made from 50mM  $\text{DMSO-d}_6$  stock solutions. Total  
106  $\text{DMSO-d}_6$  concentration was kept constant by backfilling every sample to a total of 4%  
107  $\text{DMSO}$ .  $K_D$ s were calculated from the differences in chemical shift induced by the small  
108 molecules upon interacting with the protein. Average chemical shifts from the  $^1\text{H}$  and  $^{15}\text{N}$   
109 dimension were calculated according to the following equation:

$$110 \quad \Delta\delta_{obs} = \sqrt{[\delta_H^2 + (\alpha \cdot \delta_N)^2]} \quad \text{with } \alpha \text{ set to } 0.14$$

111 The  $\Delta\delta_{obs}$  values at the respective ligand concentrations and the total concentration  
112 of protein allow a fit to the  $K_D$  value of the ligand as long as it is binding under fast  
113 exchange conditions as was the case for most of the compounds tested.(4) Usually  $\Delta\delta_{obs}$   
114 values of 3 to 5 different resonances were used and an average  $K_D$  determined. The  
115 following equation was used to determine the individual  $K_D$ s:

$$116 \quad \Delta\delta_{obs} = \Delta\delta_{max} \left[ \frac{([P]_t + [L]_t + KD) - \sqrt{([P]_t + [L]_t + KD)^2 - 4([P]_t[L]_t)}}}{2[P]_t} \right]$$

117

### 118 ITC assays

119 Calorimetric experiments were performed on a Microcal PEAQ-ITC calorimeter  
120 (MicroCalTM, LLC Northampton, MA). Protein solutions were measured in 20 mM  
121 HEPES, 150 mM NaCl, 3%  $\text{DMSO}$ , pH 7.5. All measurements were carried out at 25 $^\circ\text{C}$ .  
122 Titrations were performed in inverse mode. The cell was loaded with compound solutions  
123 in the range of 10 to 100  $\mu\text{M}$ . All injections were performed using an initial injection of  
124 0.5  $\mu\text{L}$  followed by 19 injections of 2  $\mu\text{L}$  of protein in the range of 130-500  $\mu\text{M}$ . The data  
125 were analyzed with the MicroCal PEAQ-ITC analysis software package. The first data

126 point was excluded from the analysis. Thermodynamic parameters were calculated ( $\Delta G =$   
127  $\Delta H - T\Delta S = -RT\ln K_B$ , where  $\Delta G$ ,  $\Delta H$  and  $\Delta S$  are the changes in free energy, enthalpy and  
128 entropy of binding, respectively).

129

### 130 Protein purification, nucleotide exchange and crystallization

131 The KRAS construct, based on uniprot identifier P01116-2 (KRAS4-B) amino acids  
132 1-169, was originally obtained from the Structural Genomics Consortium (SGC, Oxford)  
133 in a pET28 vector. KRAS constructs (G12D; G12D, C118S; G12D, C118S, T35S; and  
134 G12V) were expressed with an N-terminal His6-tag followed by a TEV (tobacco etch  
135 virus protease) cleavage site. Mutations were inserted by QuikChange II Site-Directed  
136 Mutagenesis Kit (Agilent) and confirmed by sequencing. The Q61H mutation, originally  
137 present in the construct, was reverted to Q. For crystallization, tags were removed by  
138 cleavage with TEV leaving an additional glycine at the N-terminus of the proteins after  
139 cleavage with TEV.

140 NRAS wt: The expressed protein corresponds to amino acids 1-172 of reference  
141 sequence P01111 (uniprot) with an additional glycine at the N-terminus after cleavage of  
142 the His-tag. A surface cysteine (C118) was mutated to serine for stability reasons.

143 HRAS wt: The expressed protein corresponds to amino acids 1-166 of reference  
144 sequence P01112 (uniprot) with an additional glycine at the N-terminus after cleavage of  
145 the His-tag.

### 146 Expression and Purification

147 KRAS gene constructs were expressed in E. coli BL21 (DE3) cells in Terrific Broth  
148 (TB) media, induced with 0.2 mM IPTG at 18°C for 18 h.

149 Cells were harvested by centrifugation and stored at -80 °C. Cell pellets were  
150 extracted by sonication in 20 mM Tris, 500mM NaCl, 5 mM imidazole, 0.5% 3-[(3-  
151 cholamidopropyl)dimethylammonio]-1-propanesulfonate (CHAPS), containing protease  
152 inhibitors (cOmplete, EDTA-free, Merck), pH 8.0 (extraction buffer). Cell debris was  
153 removed by centrifugation for 45 min at 16,000 rpm in a JA 16,250 rotor (Beckman) at  
154 4°C. Recombinant KRAS was loaded onto Ni-NTA resin (Qiagen) by incubation for 2.5  
155 h on ice. The slurry was loaded into a column and washed extensively with extraction  
156 buffer (without protease inhibitors). KRAS was eluted with 0.25 M imidazole in  
157 extraction buffer, desalted into 20 mM HEPES, 150 mM NaCl, pH 7.5 (HiPrep Desalting,  
158 GE Healthcare) and supplemented with 1 mg GDP per 20 mg protein and 5 mM MgCl<sub>2</sub>.  
159 The His-tag was cleaved off by incubation with TEV protease overnight at 4°C. On the  
160 following day the cleaved His-tag was removed by passing the protein solution through a  
161 Ni-NTA column (HisTrap, GE Healthcare).

162 KRAS protein was then further purified by gel filtration chromatography (HiLoad  
163 75S, GE Healthcare) in 20 mM HEPES, 150 mM NaCl, pH 7.5. The purity of the KRAS  
164 preparations was checked by SDS-PAGE electrophoresis and pure fractions were pooled.  
165 Protein solutions were then concentrated in a pressurized stir-cell to >1 mM and used  
166 either as the GDP-bound form or underwent nucleotide exchange (see below) for  
167 generation of GCP-bound forms.

168 Similar protocols were used for preparation of NRAS and HRAS forms.

### 169 Nucleotide Exchange

170 Nucleotides were exchanged by a modification of the protocol devised by Eberth et  
171 al.(5) In brief: 1 U/mg protein of agarose bead-coupled alkaline phosphatase and a 1.5

172 molar excess of GppCp was added to concentrated (1 mM) KRAS (GDP) after addition  
173 of 0.2 M (NH<sub>4</sub>)<sub>2</sub>SO<sub>4</sub>, 1 mM ZnCl<sub>2</sub> (final concentrations) to the KRAS preparation with  
174 rapid mixing. The reaction mix was incubated for 3 h at 4°C. After 3 hours, another 1 U  
175 agarose bead-coupled alkaline phosphatase aliquot and GppCp was added, corresponding  
176 to a 1.5 molar excess over KRAS. After another 3 hours an additional aliquot of agarose  
177 bead-coupled alkaline phosphatase and GppCp was added. The mixture was then  
178 incubated for 18 h at 4°C. The solution was centrifuged at 1500 x g, 4°C to remove the  
179 alkaline phosphatase beads. The mixture was then passed through a HiPrep Desalting  
180 26/10 (GE Healthcare) column equilibrated in 20 mM Tris, 2 mM MgCl<sub>2</sub>, 2 mM DTT,  
181 pH 7.5 and the protein fraction collected. The degree of nucleotide exchange was  
182 analyzed by reversed-phase HPLC.

### 183 Protein Crystallization

184 Protein crystallization was done using the hanging drop method by mixing 2.0 μL of  
185 apo KRAS G12D (30 mg/mL in 20 mM Tris, 2 mM MgCl<sub>2</sub>, 2 mM DTT, pH 7.5) and 3-5  
186 fold excess of compound. Crystallization conditions for the respective co-crystallization  
187 trials were: 1) compound **15**: 30% PEG3350, 0.2 M potassium acetate; 2) **18**: 20%  
188 PEG3350, 0.2M ammonium nitrate; 3) **22**: Molecular Dimensions Morpheus Screen with  
189 30% Precipitant Mix1, 0.1M Morpheus buffer system 2 pH 7.5 and 10% nitrate  
190 phosphate sulfate mix; 4) **BI 2852**: 25% PEG3350, 0.2M ammonium sulfate and 0.1M  
191 bis-TRIS buffer at pH 6. Crystals grew within a few days to a final size of 100-200 μm  
192 and were frozen in liquid nitrogen with 25% ethylene glycol as cryo protectant. Data  
193 were collected either at a homelab source (Rigaku compact homelab source with a  
194 Saturn944+ detector; wavelength 1.5418 Å) or at the SLS beam line X06SA (Swiss Light  
195 Source, Paul Scherrer Institute; wavelength of 1 Å using the PILATUS 6M detector).

196 Images were processed with autoPROC.(6)

197 The resolution limits were set using default autoPROC settings using STARANISO  
198 for anisotropic resolution cut-off for compounds **2-4**. The structures were solved by  
199 molecular replacement using the KRAS structure 4EPV as a search model. Subsequent  
200 model building and refinement was done using standard protocols using CCP4, (7)  
201 (Collaborative Computational Project, Number 4) COOT(8) and autoBUSTER.(9)

202 For **15** PDB Code 6GJ5 the unit cell parameters were a = 42.07 Å, b = 40.04 Å, c =  
203 94.28 Å and α, γ = 90° and β = 101,1°, the resolution = 1.49 Å, data and the structure  
204 was refined to Rwork and Rfree values of 18.43 % and 20.29 %, respectively, with 98.1  
205 % of the residues in Ramachandran favoured regions as validated with Molprobit.(10)

206 For **18** PDB Code 6GJ6 (unit cell: a = 85.9 Å, b = 85.9 Å, c = 47.525 Å, α, γ = 90°  
207 and β = 120°, resolution = 1.76 Å) was refined to R/Rfree = 18.4/21.1 % with 96.86 % of  
208 the residues in Ramachandran favoured regions.

209 For **22** PDB Code 6GJ7 (unit cell: a = 41.8 Å, b = 116.7 Å, c = 91.8 Å, α, β, γ = 90°,  
210 resolution = 1.67 Å) was refined to R/Rfree = 22.6/25.7 % with 96.34 % of the residues  
211 in Ramachandran favoured regions.

212 For **BI 2852** PDB Code 6GJ8 (unit cell: a = 41.6 Å, b = 116.84 Å, c = 91.48 Å, α, β,  
213 γ = 90°, resolution = 1.65 Å) was refined to R/Rfree = 17.6/19.8 % with 97,01 % of the  
214 residues in Ramachandran favoured regions.

215 Statistics for data collection and refinement can be found in Table S7.

216 Stereo images (wall-eye stereo and cross-eye stereo) can be found in Figure S2.

217 The coordinates and structure factors of the structures have been deposited at the  
218 Protein Data Bank with the accession codes PDB Code **6GJ5, 6GJ6, 6GJ7, 6GJ8**.

### 219 Alpha Screen Assays

220 Measurements of various protein–protein interactions were performed using the Alpha  
221 Screen technology developed by Perkin Elmer. Recombinant RAS proteins (H-, N-, K-  
222 RAS variants; all KRAS variants are based on KRAS isoform 4B (uniprot id P01116-2);  
223 KRAS (G12D) 1-169, N-terminal 6His-tag, C-terminal avi-tag was from Xtal  
224 BioStructures, Inc., KRAS (G12C) 1-169, C-terminal avi-tag, biotinylated, mutations:  
225 C51S, C80L, C118S, NRAS(wt) 1-172, C-terminal avi-tag, biotinylated; HRAS(wt) 1-  
226 166, C-terminal avi-tag, biotinylated). Biotinylation was performed *in vitro* with  
227 recombinant BirA biotin-protein ligase as recommended by the manufacturer (Avidity  
228 LLC, Aurora, Colorado, USA). Interacting proteins such as SOS1 (564-1049, N-terminal  
229 GST-tag, TEV cleavage site), cRaf (1-303, N-terminal GST-tag, TEV cleavage site) and  
230 PI3KA- RBD (160-317, N-term-HIS\_GST-tag) were expressed as glutathione S  
231 transferase (GST) fusions. Accordingly, the Alpha Screen beads were glutathione coated  
232 Alpha Lisa acceptor beads (Perkin Elmer AL 109 R) and Alpha Screen Streptavidin  
233 conjugated donor beads (Perkin Elmer 6760002L). Nucleotides were purchased from  
234 Sigma (GTP #G8877, GDP #G7127), Tween-20 from Biorad (#161-0781). All  
235 interaction assays were carried out in PBS, containing 0.1% bovine serum albumin,  
236 0,05% Tween-20 and 10  $\mu$ M of the corresponding nucleotide. Assays were carried out in  
237 white ProxiPlate-384 Plus plates (Perkin Elmer #6008280) in a final volume of 20  $\mu$ L. In  
238 brief, biotinylated RAS proteins (10 nM final concentration) and GST-SOS1, GST-PI3K  
239 or GST-CRAF (10 nM final) were mixed with glutathione acceptor beads (5  $\mu$ g/mL final  
240 concentration) in buffer, containing the corresponding nucleotides (GDP or GTP for  
241 assays containing SOS1, only GTP for interaction assays containing PI3K or CRAF) and  
242 were incubated for 30 min at room temperature. After addition of streptavidin donor  
243 beads (5  $\mu$ g/mL final concentration) under green light, the mixture was further incubated  
244 for 60 min in the dark at room temperature. Single oxygen induced fluorescence was  
245 measured at an Enspire multimode plate reader (Perkin Elmer) according to the  
246 manufacturer's recommendations. Data were analyzed using the GraphPad Prism data  
247 software.

### 248 Cell Culture

249 NCI-H358 cells (ATCC HTB-182, Lot# 60322588) were grown in cell culture flasks  
250 (175 cm<sup>2</sup>) using RPMI medium supplemented with 10% fetal bovine serum. Cultures  
251 were incubated at 37 °C and 5% CO<sub>2</sub> in a humidified atmosphere, with medium change  
252 or subcultivation 2-3 times a week. NCI-H23 cells (ATCC® Number: CRL-5800™)  
253 were grown in cell culture flasks (175 cm<sup>2</sup>) using RPMI medium supplemented with  
254 10% fetal bovine serum. Cultures were incubated at 37 °C and 5% CO<sub>2</sub> in a humidified  
255 atmosphere, with medium change or subcultivation 2-3 times a week. In case starvation  
256 conditions were used in combination with EGF stimulation, cells were kept in medium  
257 containing 2% FBS for 24h before compound addition for 2 hours followed by EGF  
258 stimulation (50ng/mL) for 10 minutes.

259 Control cell lines (BRAF V600E mutated) were A375 (ATCC® CRL-1619™, grown in  
260 DMEM 10% FCS), RKO (ATCC® CRL-2577™, grown in EMEM 10% FCS), Colo 201

263 (ATCC® CCL-224™; grown in RPMI 10% FCS) and SK-MEL-28 (ATCC® HTB-  
264 72™, grown in EMEM 10% FCS). Cell cultures were incubated at 37 °C and 5% CO<sub>2</sub> in  
265 a humidified atmosphere, with medium change or subcultivation 2-3 times a week.

266  
267

#### 268 Immunoblotting

269 Cells were lysed in 1x lysis buffer (Cell Signaling #9803) and protein concentration  
270 normalized to 10µg/µL. Proteins were separated by SDS-Page and transferred to  
271 Nitrocellulose membranes (BioRad) according to standard protocols. Membranes were  
272 immunoblotted with antibodies against pERK<sup>T202/Y204</sup> (Cell Signaling #2101), total ERK  
273 (Milipore #06-182) and Tubulin (Cell Signaling #2144) in 5% BSA in TBST blocking  
274 buffer. After primary antibody incubation membranes were incubated with anti-rabbit  
275 IgG secondary antibody (Dako #P0448) and detected with ECL (GE Healthcare Life  
276 Science #RPN2106).

277

#### 278 Compound treatment of cells

279 Synthesized or purchased (ARS 1620) compounds were dissolved in 100% DMSO and  
280 stored at a concentration of 10mM at -20°C. Compounds were either serially diluted in  
281 medium or directly added to reach the intended final concentration. DMSO was added  
282 to control reactions as reference to keep the final DMSO concentration in all samples  
283 equal.

284

#### 285 2D proliferation assay:

286 Cells were plated in 96 well plates (1500 cells per well) in the corresponding medium  
287 containing 10% FCS. The next day, compounds (Stock: 10mM in 100% DMSO), serially  
288 diluted in medium were added starting at 50µM with 1:5 dilutions. Cells were incubated  
289 at 37°C and 5% CO<sub>2</sub> in a humidified atmosphere for 3 days. Quantification of living cells  
290 was performed using the cell titer glow reagent (Promega) according to the  
291 manufacturer's recommendation. Luminescence was read in a 2030 VICTOR X5 (Perkin  
292 Elmer). Data were fitted by iterative calculation using a sigmoidal curve analysis  
293 program based on GraphPAD Prism with variable hill slope.

294

295

#### 296 Soft Agar proliferation assay in low serum:

297 The assay set-up was composed of a bottom layer consisting of 90 µL medium including  
298 1.2% agarose, a cell-layer consisting of 60 µL medium including 0.3% agarose and a top-  
299 layer consisting of 30 µL medium including the test compounds (without agarose). 96  
300 well plates were from Corning (96-well Ultra low binding plates #CLS2474-24EA).  
301 For preparation of the bottom layer, 4% agarose (microwave-heated, Gibco # 18300-012)  
302 was mixed with culture medium (incl. 2% FBS, HyClone # SH30071.03) to a final  
303 dilution of 1.2% agarose in medium. Each 96 well was filled with 90 µL of the bottom  
304 layer suspension and cooled to room temperature for about 1h. For the cell-layer cells  
305 were trypsinized, counted and plated in 60 µL culture medium containing 2% FCS  
306 including 0.3% agarose (1500 cells per well). After cooling to room temperature for ~1h,  
307 the plates were incubated over night at 37°C and 5% CO<sub>2</sub> in a humidified atmosphere.

308 The next day the compounds (30 $\mu$ L of serial dilutions) were added in triplicates. The  
309 concentration of the test compounds covered the range between 10 micro molar and 0.13  
310 nano molar minimum. Compounds (Stock: 10mM in 100% DMSO) were diluted in  
311 medium. Cells were incubated at 37°C and 5% CO<sub>2</sub> in a humidified atmosphere for 14  
312 days. For detection of viable cells Alamar Blue (#DAL1100CSTM1, Invitrogen) dye was  
313 added according to manufacturer's instructions. Fluorescence intensity was determined  
314 using a fluorescence reader (2030 VICTOR X5, Perkin Elmer). The excitation  
315 wavelength was 544/15 nm, emission 590 nm. Data were fitted by iterative calculation  
316 using a sigmoidal curve analysis program based on GraphPAD Prism with variable hill  
317 slope.

318

#### 319 MAPK pathway signaling (pERK, pAKT quantification)

320 MSD 96-well multispot assays for Phospho/Total ERK1/2 and Phospho(Ser473)/Total  
321 AKT whole cell lysate kits (Meso Scale Discovery, Gaithersburg, MD, #K15107D,  
322 #K15100D) were used according to the manufacturer's instructions. Briefly, 50.000  
323 cells were seeded per well and grown in 96 well plates. Cells were washed in ice cold  
324 PBS and lysed in 50 $\mu$ L ice-cold lysis buffer supplemented with the provided protease  
325 inhibitors. MSD plates were blocked for 1h, washed and 40 $\mu$ L of lysate was added in  
326 duplicates to wells and incubated at room temperature for 3 hours while shaking at  
327 400rpm. To measure the amount of phosphorylated AKT or ERK, the specific primary  
328 antibody was added for 1 hour. After washing, read buffer was added and the plates  
329 were measured on a SECTOR 6000 instrument (Meso Scale Discovery). Samples were  
330 normalized to total ERK or total AKT values, respectively.

331

#### 332 RAS GTP detection (Ras G-LISA Activation assay):

333 Ras-GTP levels were analyzed using a Ras G-LISA assay kit (Cytoskeleton Inc.,  
334 Denver, CO, USA, #BK131) according to the manufacturer's instructions. Briefly,  
335 600.000 cells were seeded in 6 wells and grown to 70% confluence. Cells were washed  
336 with ice-cold PBS and lysed in 80 $\mu$ L ice-cold lysis buffer supplemented with the  
337 provided protease inhibitor cocktail. Lysates were quickly frozen in liquid nitrogen  
338 and stored at -80°C until further usage. After normalizing protein concentration, 40 $\mu$ g  
339 of protein was added in duplicates to wells of the Ras G-LISA plate coated with Ras  
340 GTP-binding protein and incubated at 4°C for 30 minutes while shaking at 400rpm.  
341 After washing, antigen presenting buffer was added for 2 minutes. To measure bound  
342 Ras GTP levels, wells were subsequently incubated with an anti-Ras primary antibody  
343 (1:50) followed by a HRP-labeled secondary antibody (1:500) and finally by adding a  
344 HRP detection reagent. Absorbance was measured by 490nm using an EnSpire  
345 Multimode Reader (Perkin Elmer). Background was determined by a negative control  
346 well and subtracted from all samples.

347

#### 348 KRASG12D::SOS1 GTP TR-FRET assay

349 This assay was used to identify compounds which competitively interact with the  
350 binding of KRAS G12D to SOS1 in the presence of GTP.

351 The following binding partners have been used in this assay. Biotinylated KRAS  
352 G12D protein corresponding to KRAS (amino acids 1-169, with the following changes to  
353 the natural protein: G12D) was expressed in E. coli with a carboxy-terminal Avi tag



354 (amino acid sequence GGGLNDIFEAQKIEWHE). GST- tagged SOS1 protein  
355 corresponding to SOS1 (amino acids 564-1049) with an amino-terminal GST-tag and a  
356 Tobacco-etch-virus (TEV) protease cleavage site was expressed in E. coli and purified by  
357 affinity chromatography on a GSH-column, followed by desalting (HiPrep 26/10  
358 Desalting, GE Healthcare) into 20 mM Tris, 200 mM NaCl, 10% Glycerol, 1mM DTT,  
359 pH 8.0. The tag was not cleaved.

360 Compounds are dispensed onto assay plates (Proxiplate 384 PLUS, white,  
361 PerkinElmer) using an Access Labcyte Workstation with the Labcyte Echo 55x from a  
362 DMSO solution. For the chosen highest assay concentration of 500  $\mu$ M or 100  $\mu$ M (this  
363 can be changed upon request), 150 nL of compound solution are transferred from a 50  
364 mM or 10 mM DMSO compound stock solution. Compounds are tested in duplicates. A  
365 series of 11 concentrations is transferred for each compound at which each concentration  
366 is fivefold lower than the previous one. DMSO is added such that every well has a total  
367 of 150 nL compound solution. The assay runs on a fully automated robotic system. For  
368 the assay 15  $\mu$ L containing KRAS G12D protein (15 nM final assay concentration),  
369 SOS1 (10 nM final assay concentration), GTP (10  $\mu$ M final assay concentration), Lance  
370 Eu-W1024 labeled Streptavidin (1.5 nM final assay concentration) and Anti-GST  
371 surelight APC (30 nM final assay concentration) mixed in assay buffer (1x PBS; 0.05%  
372 Tween20; 0.1 % BSA; filtered) are added to the 150 nl of compounds. Plates are kept at  
373 room temperature. After 60 minutes incubation time the TR-FRET signal is measured in  
374 a PerkinElmer Envision HTS Multilabel Reader using the TR-FRET LANCE Ultra specs  
375 of PerkinElmer. Each plate contains negative controls (diluted DMSO instead of test  
376 compound; described mix with KRAS G12D protein) and positive controls (diluted  
377 DMSO instead of test compound; described mix without KRAS G12D). Negative and  
378 positive control values are used for normalization.

379

### 380 Nucleotide Exchange assay

381 The ability of the compounds to affect nucleotide exchange on Ras was assessed using  
382 the method previously reported (11, 12). Briefly, the baseline fluorescence of KRAS  
383 loaded with BODIPY-GDP (Life Technologies) was recorded for 10 seconds prior to the  
384 addition of compound. A second addition of excess GTP  $\pm$  SOScat was performed at 120  
385 seconds and nucleotide exchange was monitored as a decrease in fluorescence with time.  
386 Changes in fluorescence were monitored using a Hamamatsu FDSS 6000 with readings  
387 conducted every 3 seconds for 30 minutes. Raw fluorescence data was fit to a single  
388 exponential decay function using XLfit (IDBS) software.

389

390

### 391 Synthetic procedures

392

#### List of abbreviations

|       |                                                                  |
|-------|------------------------------------------------------------------|
| AcOH  | Acetic acid                                                      |
| MeCN  | Acetonitrile                                                     |
| Boc   | <i>tert</i> .butoxy carbonyl; di- <i>tert</i> -butyl dicarbonate |
| cHex  | Cyclohexane                                                      |
| DAD   | Diode array detector                                             |
| DCM   | Dichloromethane, CH <sub>2</sub> Cl <sub>2</sub>                 |
| Dppf  | 1,1'-Bis(diphenylphosphino)ferrocene                             |
| DIPEA | Diisopropylethyl amine                                           |

|                                  |                                                             |
|----------------------------------|-------------------------------------------------------------|
| DME                              | 1,2-Dimethoxyethane                                         |
| DMF                              | <i>N,N</i> -Dimethylformamide                               |
| DMSO                             | Dimethylsulphoxide                                          |
| EtOAc or EA                      | Ethyl acetate                                               |
| EtOH                             | Ethanol                                                     |
| h                                | Hour(s)                                                     |
| Hex                              | Hexane                                                      |
| HPLC                             | High performance liquid chromatography                      |
| HRMS                             | High resolution mass spectroscopy                           |
| INT                              | Intermediate                                                |
| KOAc                             | Potassium acetate                                           |
| LC                               | Liquid Chromatography                                       |
| M                                | Molar (mol/L)                                               |
| MeOH                             | Methanol                                                    |
| μL                               | Microliter                                                  |
| μm                               | Micrometer                                                  |
| Min                              | Minute(s)                                                   |
| mL                               | Milliliter                                                  |
| Mm                               | Millimeter                                                  |
| MS                               | Mass spectrometry                                           |
| MsCl                             | Methanesulfonyl chloride                                    |
| Nm                               | Nanometer                                                   |
| N                                | Normal                                                      |
| NMR                              | Nuclear magnetic resonance                                  |
| PE                               | Petrolether                                                 |
| Pd <sub>2</sub> dba <sub>3</sub> | Tris(dibenzylideneacetone)dipalladium(0)                    |
| Pd(dppf)Cl <sub>2</sub>          | [1,1'-Bis(diphenylphosphino)ferrocene]dichloropalladium(II) |
| Ppm                              | Parts per million                                           |
| prot.                            | Protonated                                                  |
| RP                               | Reversed phase                                              |
| Rt                               | Room temperature (20 to 25°C)                               |
| SM                               | Starting material                                           |
| TEA                              | Triethylamine                                               |
| TFA                              | Trifluoroacetic acid                                        |
| THF                              | Tetrahydrofuran                                             |
| t <sub>R</sub>                   | Retention time [min]                                        |
| XPhos                            | 2-Dicyclohexylphosphino-2',4',6'-triisopropylbiphenyl       |

393

394

### General Methods

395

396

397

398

399

400

401

402

403

If not specifically defined herein, compounds were obtained from commercially suppliers such as Sigma-Aldrich. Unless otherwise indicated all reactions were carried out in standard commercially available glassware using standard synthetic chemistry methods. Air-sensitive and moisture-sensitive reactions were performed under an atmosphere of dry nitrogen or argon with dried glassware. Commercial starting materials were used without further purification. Solvents used for reactions were of commercial “dry”- or “extra-dry” or “analytical” grade. All other solvents used were reagent grade.

Preparative RP-HPLC was carried out on Agilent or Gilson systems using columns from Waters (Sunfire C18 OBD, 5 or 10 μm, 20x50 mm, 30x50 mm or 50x150 mm; X-

404 Bridge C18 OBD, 5 or 10  $\mu\text{m}$ , 20x50, 30x50, or 50x150 mm) or YMC (Triart C18, 5 or  
405 10  $\mu\text{m}$ , 20x50 mm, or 30x50 mm). Unless otherwise indicated compounds were eluted  
406 with MeCN/water gradients using either acidic (0.2 % HCOOH or TFA) or basic water (5  
407 mL 2 M  $\text{NH}_4\text{HCO}_3$  + 2 mL  $\text{NH}_3$  (32 %) made up to 1 L with water).

408 NMR experiments were recorded on Bruker Avance HD 400 MHz and 500 MHz  
409 spectrometers equipped with BBO Prodigy and TCI cryoprobes at 298 K, respectively.  
410 Samples were dissolved in 600  $\mu\text{L}$  DMSO- $d_6$  and TMS was added as an internal  
411 standard. 1D  $^1\text{H}$  spectra were acquired with  $30^\circ$  excitation pulses and an interpulse delay  
412 of 4.2 s with 64k data points and 20 ppm sweep width.

413 1D  $^{13}\text{C}$  spectra were acquired with broadband composite pulse decoupling  
414 (WALTZ16) and an interpulse delay of 3.3 sec with 64 k data points and a sweep width  
415 of 240 ppm. Processing and analysis of 1D spectra was performed with Bruker Topspin  
416 3.2 software. No zero filling was performed and spectra were manually integrated after  
417 automatic baseline correction. Chemical shifts are reported in ppm on the  $\delta$  scale.

418 HSQC spectra were recorded on all samples to aid the interpretation of the data and  
419 to identify signals hidden underneath solvent peaks. Spectra were acquired with sweep  
420 widths obtained by automatic sweep width detection from 1D reference spectra in the  
421 direct dimension with 1k data points and with 210 ppm and 256 data points in the indirect  
422 dimension.

423 Analytical LC/MS [LC/MS(BAS1)] data were measured on an Agilent HPLC 1100  
424 Series with Agilent LC/MSD SL detector using a Waters X-Bridge C18, 2.5  $\mu\text{m}$ ,  
425 2.1x20mm column (Part.No. 186003201) and solvent A [20 mM aqueous  $\text{NH}_4\text{HCO}_3$ /  
426  $\text{NH}_3$  (pH 9)] and solvent B [acetonitrile HPLC grade] as eluent (additional settings: flow  
427 1mL/min; injection volume 5  $\mu\text{L}$ ; column temp. 60  $^\circ\text{C}$ ). Standard gradient: 0.00 min: 10 %  
428 B; 0.00 – 1.50 min: 10 % -> 95 % B; 1.50 – 2.00 min: 95 % B; 2.00 – 2.10 min: 95 % ->  
429 10 % B.

430 HRMS data were recorded using a LTQ Orbitrap XL (Thermo Scientific) coupled  
431 with a Triversa Nanomate Nanospray ion source (ADVION Bioscience Inc.). The mass  
432 calibration was performed using the Pierce LTQ Velos ESI positive ion calibration  
433 solution from Thermo Scientific (Lot PF200011, Product Nr. 88323).

434 *MS parameter:*

|     |                       |                                                        |
|-----|-----------------------|--------------------------------------------------------|
| 435 | Scan window           | 50 – 400amu, linear ion trap (LTQ) max. injection time |
| 436 |                       | 500ms with 1 microscan                                 |
| 437 | Resolution            | 60000 (Orbitrap)                                       |
| 438 | Mass accuracy         | $\leq 5$ ppm                                           |
| 439 | Ion mode              | positive                                               |
| 440 | Capillary temperature | 200 $^\circ\text{C}$                                   |
| 441 | Capillary voltage     | 60eV                                                   |
| 442 | Tube lens potential   | 110eV                                                  |

443

444 *Nanomate spray-parameter for infusion mode:*

|     |                            |                 |
|-----|----------------------------|-----------------|
| 445 | NanoESI voltage            | 1.45kV          |
| 446 | $\text{N}_2$ -gas pressure | 0.45psi         |
| 447 | Sample volume              | 5 $\mu\text{L}$ |

448

449 *Exact mass recording:*

450 Acquire time 0.4sec, average spectra of 10 scans  
451 Sample dilution: 10mM DMSO stock solution diluted 1:200 in 50%  
452 MeOH +0.01% FA  
453

454 Compound Syntheses

455 2-Formyl-4-hydroxy-benzoic acid methyl ester (27)  
456

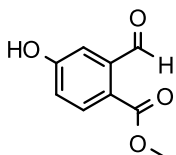

457  
458 To a stirred solution of 4-hydroxy-2-methylbenzoic acid (50.0 g; 329 mmol) in  
459 MeOH (500 mL) thionyl chloride (48.9 mL; 657.3 mmol) is added under ice cooled  
460 condition and the reaction mixture is heated at 80 °C for 4 h. The solvent is evaporated  
461 and the residue is dissolved in dichloromethane (500 mL) and NaHCO<sub>3</sub> (300 mL). The  
462 organic phase is separated and the aqueous part is extracted with dichloromethane (2 x  
463 200 mL). The organic phases are combined, washed with brine, dried over Na<sub>2</sub>SO<sub>4</sub>,  
464 filtered and concentrated in vacuo to yield an off white solid.

465 TBSCl (10.83 g; 72 mmol) is added to a stirred solution of 4-hydroxy-2-  
466 methylbenzoic acid methyl ester 24 (10.0 g; 60 mmol) in DMF (100 mL) at 0 °C. After  
467 15 min DIPEA (22.2 mL; 120 mmol) is added to the reaction mixture and stirring is  
468 continued for overnight at room temperature. The reaction mixture is treated with water  
469 and extracted with hexane, washed with water, the combined organic phases are dried  
470 over Na<sub>2</sub>SO<sub>4</sub> and concentrated under reduced pressure to obtain the crude TBS protected  
471 compound 4-(tert-Butyl-dimethyl-silyloxy)-2-methyl-benzoic acid methyl ester 25.

472 N-Bromosuccinimide (361.5 g; 2031 mmol) and AIBN (74.11 g; 451.3 mmol) are  
473 added to a stirred solution of 4-(tert-Butyl-dimethyl-silyloxy)-2-methyl-benzoic acid  
474 methyl ester 25 (126.56 g; 451.3 mmol) in benzene (3.1 L) at rt. The reaction mixture is  
475 heated to reflux overnight. The reaction mass is dissolved in DCM and filtered to remove  
476 excess NBS and then treated with hexane and filtered again. The filtrate is concentrated  
477 to get the liquid crude material 4-(tert-Butyl-dimethyl-silyloxy)-2-dibromomethyl-  
478 benzoic acid methyl ester 26 was used directly in the next step.

479 Silver nitrate (52.912 g; 0.311 mol) is added to a stirred solution of 4-(tert-Butyl-  
480 dimethyl-silyloxy)-2-dibromomethyl-benzoic acid methyl ester 26 (65.0 g; 148.33  
481 mmol) in acetone/water (5:1) (900 mL) and the reaction mixture is stirred at room  
482 temperature for 16 h. The reaction mixture was filtered and concentrated in vacuo, taken  
483 up in EtOAc (50 mL) and is washed with water (3 x 20 mL). The organic phases are  
484 dried over Na<sub>2</sub>SO<sub>4</sub>, filtered and concentrated under reduced pressure. The crude brown  
485 oil is purified by column chromatography over silica gel using EtOAc/Hex (1:9, v/v) as  
486 eluent to obtain an off white solid. The solid material is then washed by 5%EtOAc\Hex to  
487 yield 2-formyl-4-hydroxy-benzoic acid methyl ester 27 (11.0 g; 61.0 mmol; 41.2 %).  
488 HPLC method: LCMSBAS1: t<sub>ret</sub> [min] = 0.20; [M-H]<sup>+</sup> = 181.

489  
490 5-Hydroxy-3-(2-hydroxymethyl-1H-indol-3-yl)-2,3-dihydro-indol-1-one (29)  
491

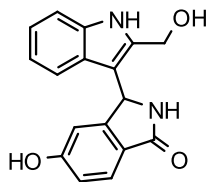

492  
493

494 A suspension of (1H-indol-2-yl)methanol (28) (1.078 g; 6.594 mmol; commercial  
495 from ArkPharm), methyl 2-formyl-4-hydroxy-benzoate (27) (1.0 g; 5.495 mmol) and  
496 ammonia solution (28% in water, 7.816 mL; 54.952 mmol) in water (10 mL) is stirred in  
497 a capped 20 mL microwave vial and heated overnight at 85°C. The reaction mixture is  
498 diluted and dissolved with ACN, filtered and purified by preparative RP-HPLC using a  
499 ACN/water gradient as eluent to give 5-hydroxy-3-(2-hydroxymethyl-1H-indol-3-yl)-2,3-  
500 dihydro-isoindol-1-one (29) (1.048 g; 3.561 mmol; 64.8 %). HPLC method:  
501 LCMSBAS1:  $t_{\text{ret}}$  [min] = 0.46;  $[M+H]^+ = 295$ .

502 The alcohol (1 g; 340  $\mu\text{mol}$ ) is separated via preparative chiral SFC to give (3S)-5-  
503 hydroxy-3-[2-(hydroxymethyl)-1H-indol-3-yl]-2,3-dihydro-1H-isoindol-1-one (493 mg;  
504 168  $\mu\text{mol}$ ) and (3R)-5-hydroxy-3-[2-(hydroxymethyl)-1H-indol-3-yl]-2,3-dihydro-1H-  
505 isoindol-1-one (484 mg; 164.5  $\mu\text{mol}$ ).

506  
507  
508

3-(6-hydroxy-3-oxo-2,3-dihydro-1H-isoindol-1-yl)-1H-indole-2-carbaldehyde (30)

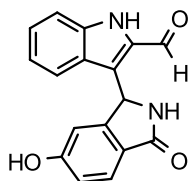

509  
510

511 5-Hydroxy-3-[2-(hydroxymethyl)-1H-indol-3-yl]-2,3-dihydro-1H-isoindol-1-one  
512 (29) (2.0 g; 6.59 mmol) and  $\text{MnO}_2$  (6.367 g; 65.92 mmol) are suspended in MeOH and  
513 heated to reflux for 30 min. The hot suspension is filtered and washed with hot MeOH  
514 (100 mL). After cooling, MeOH is removed under reduced pressure and the crude  
515 product is purified by flash chromatography on  $\text{SiO}_2$  using a DCM/MeOH gradient (0%-  
516 10% MeOH). The product containing fractions are combined, concentrated under reduced  
517 pressure, dissolved in ACN/water (1:1) and freeze dried to give 3-(6-hydroxy-3-oxo-2,3-  
518 dihydro-1H-isoindol-1-yl)-1H-indole-2-carbaldehyde (30) (1.3 g; 4.45 mmol; 67.5 %).  
519 HPLC method: LCMSBAS1:  $t_{\text{ret}}$  [min] = 0.53;  $[M+H]^+ = 293$ .

520 In a similar procedure starting from the chiral separated alcohols e.g. (3S)-5-  
521 hydroxy-3-[2-(hydroxymethyl)-1H-indol-3-yl]-2,3-dihydro-1H-isoindol-1-one (156 mg;  
522 530  $\mu\text{mol}$ ) the chiral aldehyde 3-[(1S)-6-hydroxy-3-oxo-2,3-dihydro-1H-isoindol-1-yl]-  
523 1H-indole-2-carbaldehyde (31S) (149 mg; 510  $\mu\text{mol}$ ) and aldehyde 3-[(1R)-6-hydroxy-3-  
524 oxo-2,3-dihydro-1H-isoindol-1-yl]-1H-indole-2-carbaldehyde (31R) can be synthesized.

525  
526  
527  
528

3-{2-[(dimethylamino)methyl]-1H-indol-3-yl}-5-hydroxy-2,3-dihydro-1H-isoindol-  
1-one (32)

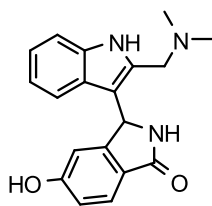

529

530

531

532

533

534

535

536

537

538

539

540

541

542

543

544

545

546

547

548

549

550

551

552

553

554

555

556

557

558

559

560

The aldehyde 3-(6-hydroxy-3-oxo-2,3-dihydro-1H-isoindol-1-yl)-1H-indole-2-carbaldehyde 30 (1.0 g; 3.42 mmol) is dissolved in DMF (10 mL) and dimethylamine (8.55 mL; 2 M solution in THF; 17.1 mmol) is added and the reaction flask is pressurized to 4 bar (58 psi) via nitrogen gas and stirred at room temperature for 15 min before sodium triacetoxyborohydride (3.63 g; 17.1 mmol) is added. The reaction mixture is stirred at room temperature overnight. The reaction mixture is filtered, the filtrate is concentrated under reduced pressure and purified by preparative RP-HPLC using a MeCN/water (5-50% MeCN, basic conditions) gradient. The product containing fractions are freeze dried to yield 3-{2-[(dimethylamino)methyl]-1H-indol-3-yl}-5-hydroxy-2,3-dihydro-1H-isoindol-1-one (32) (800 mg; 249  $\mu$ mol; 72.8 %).  $^1\text{H}$  NMR (400 MHz, DMSO- $d_6$ )  $\delta$  11.05 (s, 1H), 9.99 (br s, 1H), 8.47 (s, 1H), 7.57 (d,  $J=8.36$  Hz, 1H), 7.28 (d,  $J=8.11$  Hz, 1H), 6.96 (ddd,  $J=1.01, 7.00, 8.20$  Hz, 1H), 6.84 (dd,  $J=2.03, 8.36$  Hz, 1H), 6.72 (t,  $J=7.35$  Hz, 1H), 6.60 (br d,  $J=6.59$  Hz, 1H), 6.52 (d,  $J=1.77$  Hz, 1H), 5.93 (s, 1H), 3.72 (d,  $J=13.94$  Hz, 1H), 3.58 (br d,  $J=13.18$  Hz, 1H), 2.24 (s, 6H);  $^{13}\text{C}$  NMR (100 MHz, DMSO- $d_6$ )  $\delta$  169.7, 160.9, 151.1, 135.8, 135.1, 125.7, 124.3, 123.5, 121.0, 118.6, 118.4, 115.7, 111.3, 109.6, 109.2, 54.0, 52.3, 45.2; HRMS (CI $^+$ ): calculated for  $\text{C}_{19}\text{H}_{19}\text{N}_3\text{O}_2$  (MH $^+$ ) 322.15500, found 322.15544,  $\Delta$  1.36 ppm; LC/MS (BAS1): [M+H] $^+$  = 322;  $t_{\text{R}}$  = 0.64 min.

3-{2-[(dimethylamino)methyl]-1H-indol-3-yl}-5-hydroxy-2,3-dihydro-1H-isoindol-1-one (90 mg; 280  $\mu$ mol) are separated via chiral SFC to give (3S)-3-{2-[(dimethylamino)methyl]-1H-indol-3-yl}-5-hydroxy-2,3-dihydro-1H-isoindol-1-one (18) (35 mg; 109  $\mu$ mol) and (3R)-3-{2-[(dimethylamino)methyl]-1H-indol-3-yl}-5-hydroxy-2,3-dihydro-1H-isoindol-1-one (33) (35 mg; 109  $\mu$ mol).

18 + 33: HRMS (CI $^+$ ): calculated for  $\text{C}_{19}\text{H}_{19}\text{N}_3\text{O}_2$  (MH $^+$ ) 322.15500, found 322.15537,  $\Delta$  1.14 ppm; HRMS (CI $^+$ ): calculated for  $\text{C}_{19}\text{H}_{19}\text{N}_3\text{O}_2$  (MH $^+$ ) 322.15500, found 322.15570,  $\Delta$  2.16 ppm; LC/MS (BAS1): [M+H] $^+$  = 322;  $t_{\text{R}}$  = 0.63 min.

3-{2-[(benzylamino)methyl]-1H-indol-3-yl}-5-hydroxy-2,3-dihydro-1H-isoindol-1-one (19)

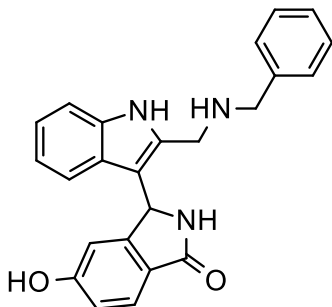

561

562

563 The aldehyde 3-(6-hydroxy-3-oxo-2,3-dihydro-1H-isoindol-1-yl)-1H-indole-2-  
564 carbaldehyde 30 (50.0 mg; 171  $\mu\text{mol}$ ) and benzylamine (20.16 mg; 188  $\mu\text{mol}$ ) are  
565 dissolved in DMF (0.5 mL) and stirred for 15 min at room temperature. The reaction  
566 mixture is treated with sodium triacetoxyborohydride (181.2 mg; 855  $\mu\text{mol}$ ) and stirring  
567 is continued for 16 h. The reaction mixture is filtered, the filtrate is concentrated under  
568 reduced pressure and purified by preparative RP-HPLC using a ACN/water (5-50%  
569 ACN) gradient. The product containing fractions are freeze dried to yield 3-{2-  
570 [(benzylamino)methyl]-1H-indol-3-yl}-5-hydroxy-2,3-dihydro-1H-isoindol-1-one (19)  
571 (51.4 mg; 134  $\mu\text{mol}$ ; 78.4 %).  $^1\text{H}$  NMR (500 MHz, DMSO- $d_6$ )  $\delta$  11.04 (s, 1H), 10.24 (br  
572 s, 1H), 10.01 (s, 1H), 8.47 (s, 1H), 7.57 (d,  $J=8.20$  Hz, 1H), 7.36-7.40 (m, 2H), 7.28-7.35  
573 (m, 4H), 7.19-7.27 (m, 1H), 6.96 (t,  $J=7.57$  Hz, 1H), 6.85 (dd,  $J=1.89, 8.20$  Hz, 1H), 6.72  
574 (br t,  $J=7.41$  Hz, 1H), 6.56 (d,  $J=1.89$  Hz, 1H), 5.88 (s, 1H), 3.94 (br s, 2H), 3.73 (br d,  
575  $J=7.57$  Hz, 2H);  $^{13}\text{C}$  NMR (125 MHz, DMSO- $d_6$ )  $\delta$  169.6, 160.9, 151.0, 140.5, 136.8,  
576 135.7, 128.3, 128.1, 126.8, 125.8, 124.3, 123.5, 120.9, 118.6, 118.3, 115.7, 111.3, 109.7,  
577 108.4, 52.4, 52.2, 43.5; HRMS (CI $^+$ ): calculated for  $\text{C}_{24}\text{H}_{21}\text{N}_3\text{O}_2$  (MH $^+$ ) 384.17065,  
578 found 384.17020,  $\Delta$  -1.18 ppm; LC/MS (BAS1): [M+H] $^+$  = 384;  $t_{\text{R}}$  = 0.93 min.

579 3-{2-[(benzylamino)methyl]-1H-indol-3-yl}-5-hydroxy-2,3-dihydro-1H-isoindol-1-  
580 one (19) (15 mg; 39  $\mu\text{mol}$ ) was separated via chiral SFC to give (3S)-3-{2-  
581 [(benzylamino)methyl]-1H-indol-3-yl}-5-hydroxy-2,3-dihydro-1H-isoindol-1-one (34) (3  
582 mg; 8  $\mu\text{mol}$ ) and (3R)-3-{2-[(benzylamino)methyl]-1H-indol-3-yl}-5-hydroxy-2,3-  
583 dihydro-1H-isoindol-1-one (35) (3 mg; 8  $\mu\text{mol}$ ) LC/MS (BAS1): [M+H] $^+$  = 384;  $t_{\text{R}}$  =  
584 1.00 min.

585

586 5-hydroxy-3-[2-({[(1H-indol-6-yl)methyl]amino}methyl)-1H-indol-3-yl]-2,3-  
587 dihydro-1H-isoindol-1-one (20)

588

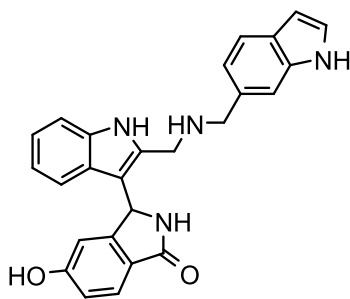

589

590

591 The aldehyde 3-(6-hydroxy-3-oxo-2,3-dihydro-1H-isoindol-1-yl)-1H-indole-2-  
592 carbaldehyde 30 (70.0 mg; 239  $\mu\text{mol}$ ) and the amine 1H-indole-6-methanamine (40.5  
593 mg; 263  $\mu\text{mol}$ ) are dissolved in DMF (1 mL) and stirred for 15 min at room temperature.  
594 The reaction mixture is treated with sodium triacetoxyborohydride (253.3 mg; 1.2 mmol)  
595 and stirring is continued for 16 h. The reaction mixture is filtered, the filtrate is  
596 concentrated under reduced pressure and purified by preparative RP-HPLC using a  
597 ACN/water (5-50% ACN) gradient. The product containing fractions are freeze dried to  
598 yield 5-hydroxy-3-[2-({[(1H-indol-6-yl)methyl]amino}methyl)-1H-indol-3-yl]-2,3-  
599 dihydro-1H-isoindol-1-one (20) (68 mg; 134  $\mu\text{mol}$ ; 67.3 %).  $^1\text{H}$  NMR (400 MHz,  
600 DMSO- $d_6$ )  $\delta$  11.12 (s, 1H), 11.02 (br s, 1H), 10.07-10.42 (m, 1H), 8.48 (s, 1H), 8.19 (s,  
601 1H), 7.58 (d,  $J=8.36$  Hz, 1H), 7.48 (d,  $J=8.11$  Hz, 1H), 7.41 (s, 1H), 7.31 (d,  $J=8.36$  Hz,

602 1H), 7.27-7.30 (m, 1H), 7.04 (d,  $J=8.11$  Hz, 1H), 6.94-7.00 (m, 1H), 6.85 (dd,  $J=2.03$ ,  
603 8.36 Hz, 1H), 6.72 (t,  $J=7.48$  Hz, 1H), 6.58 (d,  $J=1.77$  Hz, 1H), 6.50-6.56 (m, 1H), 6.38  
604 (t,  $J=1.90$  Hz, 1H), 5.91 (s, 1H), 4.03 (br s, 2H), 3.88 (br s, 2H);  $^{13}\text{C}$  NMR (100 MHz,  
605 DMSO- $d_6$ )  $\delta$  169.7, 161.0, 151.0, 136.1, 135.8, 132.3, 126.9, 125.8, 125.4, 124.3, 123.5,  
606 121.1, 119.9, 119.8, 118.7, 118.5, 115.8, 111.4, 111.2, 109.8, 108.8, 101.0, 52.9, 52.3,  
607 43.3; 1 carbon not detectable; HRMS (CI $^+$ ): calculated for  $\text{C}_{26}\text{H}_{22}\text{N}_4\text{O}_2$  (MH $^+$ )  
608 423.18155, found 423.18060,  $\Delta$  -2.25 ppm; LC/MS (BAS1): [M+H] $^+$  = 423;  $t_{\text{R}}$  = 0.93  
609 min.

610 5-Hydroxy-3-[2-({[(1H-indol-6-yl)methyl]amino}methyl)-1H-indol-3-yl]-2,3-  
611 dihydro-1H-isoindol-1-one (20) (60.0 mg; 142  $\mu\text{mol}$ ) was separated via chiral SFC to  
612 give (3S)-5-hydroxy-3-[2-({[(1H-indol-6-yl)methyl]amino}methyl)-1H-indol-3-yl]-2,3-  
613 dihydro-1H-isoindol-1-one (36) (16 mg; 38  $\mu\text{mol}$ ) and (3R)-5-hydroxy-3-[2-({[(1H-  
614 indol-6-yl)methyl]amino}methyl)-1H-indol-3-yl]-2,3-dihydro-1H-isoindol-1-one (37) (17  
615 mg; 40  $\mu\text{mol}$ ). LC/MS (BAS1): [M+H] $^+$  = 423;  $t_{\text{R}}$  = 0.93 min.

616

617 5-hydroxy-3-[2-({[(1-methyl-1H-indol-6-yl)methyl]amino}methyl)-1H-indol-3-yl]-  
618 2,3-dihydro-1H-isoindol-1-one (21)

619

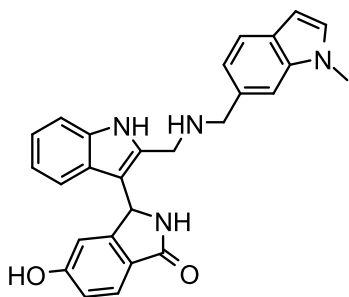

620

621

622 The aldehyde 3-(6-hydroxy-3-oxo-2,3-dihydro-1H-isoindol-1-yl)-1H-indole-2-  
623 carbaldehyde 30 (50.0 mg; 96.9%; 166  $\mu\text{mol}$ ) and (1-methyl-1H-indole-6-yl)-  
624 methylamine (33.6 mg; 199  $\mu\text{mol}$ ) are dissolved in DMF (1 mL) and stirred for 15 min  
625 at room temperature. The reaction mixture is treated with sodium triacetoxyborohydride  
626 (175.9 mg; 830  $\mu\text{mol}$ ) and stirring is continued for 16 h. The reaction mixture is filtered,  
627 the filtrate is concentrated under reduced pressure and purified by preparative RP-HPLC  
628 using a ACN/water (5-50% ACN) gradient. The product containing fractions are freeze  
629 dried to yield 5-hydroxy-3-[2-({[(1-methyl-1H-indol-6-yl)methyl]amino}methyl)-1H-  
630 indol-3-yl]-2,3-dihydro-1H-isoindol-1-one (21) (52 mg; 119  $\mu\text{mol}$ ; 71.8 %).  $^1\text{H}$  NMR  
631 (500 MHz, DMSO- $d_6$ )  $\delta$  11.11 (s, 1H), 10.15-10.37 (m, 1H), 8.49 (s, 1H), 8.20 (s, 1H),  
632 7.58 (d,  $J=8.20$  Hz, 1H), 7.48 (d,  $J=7.88$  Hz, 1H), 7.44 (s, 1H), 7.32 (d,  $J=7.88$  Hz, 1H),  
633 7.25 (d,  $J=3.15$  Hz, 1H), 7.07 (d,  $J=8.20$  Hz, 1H), 6.97 (t,  $J=7.60$  Hz, 1H), 6.85 (dd,  
634  $J=2.21$ , 8.20 Hz, 1H), 6.73 (br t,  $J=7.41$  Hz, 1H), 6.60 (d,  $J=1.58$  Hz, 1H), 6.57 (br dd,  
635  $J=0.79$ , 2.99 Hz, 1H), 6.36 (d,  $J=3.15$  Hz, 1H), 5.89 (s, 1H), 4.00 (br s, 2H), 3.86-3.92  
636 (m, 2H), 3.72 (s, 3H);  $^{13}\text{C}$  NMR (125 MHz, DMSO)  $\delta$  169.6, 161.0, 151.0, 136.6, 136.5,  
637 135.8, 132.9, 129.6, 127.2, 125.8, 124.3, 123.5, 121.1, 120.1, 119.9, 118.7, 118.4, 115.8,  
638 111.4, 109.8, 109.2, 108.6, 100.2, 52.9, 52.3, 43.2, 32.5; HRMS (CI $^+$ ): calculated for  
639  $\text{C}_{27}\text{H}_{24}\text{N}_4\text{O}_2$  (MH $^+$ ) 437.19720, found 437.19725,  $\Delta$  0.11 ppm; LC/MS (BAS1): [M+H] $^+$   
640 = 437;  $t_{\text{R}}$  = 1.00 min.



641 The pure enantiomers are synthesized analogously starting from the chiral aldehydes  
642 31S and 31R to yield (S)-5-Hydroxy-3-(2-({[(1-methyl-1H-indol-6-ylmethyl)-amino]-  
643 methyl}-1H-indol-3-yl)-2,3-dihydro-isoindol-1-one (38) and (R)-5-Hydroxy-3-(2-({[(1-  
644 methyl-1H-indol-6-ylmethyl)-amino]-methyl}-1H-indol-3-yl)-2,3-dihydro-isoindol-1-one  
645 (39).

646 38 +39: HRMS (CI<sup>+</sup>): calculated for C<sub>27</sub>H<sub>24</sub>N<sub>4</sub>O<sub>2</sub> (MH<sup>+</sup>) 437.19720, found  
647 437.19742, Δ 0.50 ppm; HRMS (CI<sup>+</sup>): calculated for C<sub>27</sub>H<sub>24</sub>N<sub>4</sub>O<sub>2</sub> (MH<sup>+</sup>) 437.19720,  
648 found 437.19719, Δ - 0.03 ppm; LC/MS (BAS1): [M+H]<sup>+</sup> = 437; t<sub>R</sub> = 1.07 min.

649

650 3-[2-({[(1-benzyl-1H-indol-6-yl)methyl]amino}methyl)-1H-indol-3-yl]-5-hydroxy-  
651 2,3-dihydro-1H-isoindol-1-one (22)

652

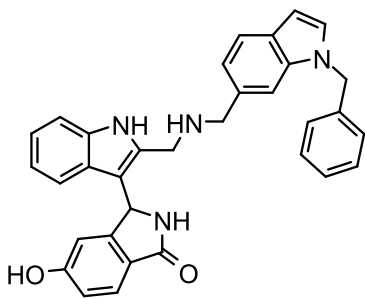

653

654

655 In a glass vial aldehyde 3-(6-hydroxy-3-oxo-2,3-dihydro-1H-isoindol-1-yl)-1H-  
656 indole-2-carbaldehyde (30) (12 mg; 96.9%; 40 μmol) is dissolved in DMF (0.5 mL) and  
657 (1-benzyl-1H-indol-6-yl)methanamine (10 mg; 42 μmol) is added and stirred at room  
658 temperature for 15 min. Sodium triacetoxyborohydride (42.2 mg; 200 μmol) is added and  
659 the mixture is stirred at room temperature for 2 h. Sodium triacetoxyborohydride (42.2  
660 mg; 200 μmol) is added again, and the reaction mixture is stirred at room temperature  
661 overnight. The reaction mixture is diluted by addition of ACN/H<sub>2</sub>O (1:1; 200 μL), filtered  
662 through a syringe filter and purified by prep. HPLC (Gilson; column: SunFire Prep C18,  
663 5μm (30\*50), gradient, acidic conditions ACN/water (5:95 to 60:40 in 8 min. flowrate:  
664 50 mL/min wavelength: 222 nm). The product containing fraction is freeze-dried to yield  
665 3-[2-({[(1-benzyl-1H-indol-6-yl)methyl]amino}methyl)-1H-indol-3-yl]-5-hydroxy-2,3-  
666 dihydro-1H-isoindol-1-one (22) (6 mg; 12 μmol; 29.4 %). <sup>1</sup>H NMR (500 MHz, DMSO-  
667 d<sub>6</sub>) δ 11.04 (s, 1H), 9.86-10.21 (m, 1H), 8.48 (s, 1H), 7.58 (d, J=8.36 Hz, 1H), 7.49 (d,  
668 J=8.11 Hz, 1H), 7.45 (s, 1H), 7.41 (d, J=3.29 Hz, 1H), 7.30 (d, J=8.11 Hz, 1H), 7.16-7.27  
669 (m, 4H), 7.11 (d, J=6.60 Hz, 2H), 7.07 (d, J=7.60 Hz, 1H), 6.96 (ddd, J=0.90, 7.03, 8.17  
670 Hz, 1H), 6.85 (dd, J=2.03, 8.11 Hz, 1H), 6.72 (t, J=7.48 Hz, 1H), 6.58 (d, J=1.77 Hz,  
671 1H), 6.49-6.56 (m, 1H), 6.44 (d, J=3.04 Hz, 1H), 5.86 (s, 1H), 5.35 (s, 2H), 3.93 (s, 2H),  
672 3.81 (br s, 2H); <sup>13</sup>C NMR (125 MHz, DMSO-d<sub>6</sub>) δ 169.7, 161.0, 151.1, 138.5, 137.1,  
673 136.1, 135.7, 133.8, 129.0, 128.6, 127.4, 127.3, 127.0, 125.9, 124.3, 123.6, 121.0, 120.3,  
674 120.0, 118.6, 118.4, 115.8, 111.3, 109.8, 109.3, 108.3, 101.1, 53.1, 52.3, 49.0, 43.5;  
675 HRMS (CI<sup>+</sup>): calculated for C<sub>33</sub>H<sub>28</sub>N<sub>4</sub>O<sub>2</sub> (MH<sup>+</sup>) 513.22850, found 513.22817, Δ - 0.65  
676 ppm; LC/MS (BAS1): [M+H]<sup>+</sup> = 513; t<sub>R</sub> = 1.24 min.

677

678 The pure enantiomers are synthesized analogously starting from the chiral aldehydes  
679 31S and 31R to yield (3S)-3-[2-({[(1-benzyl-1H-indol-6-ylmethyl)-amino]-methyl}-1H-  
indol-3-yl)-5-hydroxy-2,3-dihydro-1H-isoindol-1-one (40) and (3R)-3-[2-({[(1-benzyl-

680 1H-indol-6-ylmethyl)-amino]-methyl}-1H-indol-3-yl)-5-hydroxy-2,3-dihydro-1H-  
681 isoindol-1-one (41)

682 40+ 41: HRMS (CI+): calculated for C<sub>33</sub>H<sub>28</sub>N<sub>4</sub>O<sub>2</sub> (MH<sup>+</sup>) 513.22850, found  
683 513.22828, Δ - 0.43 ppm; HRMS (CI+): calculated for C<sub>33</sub>H<sub>28</sub>N<sub>4</sub>O<sub>2</sub> (MH<sup>+</sup>) 513.22850,  
684 found 513.22890, Δ 0.77 ppm; LC/MS (BAS1): [M+H]<sup>+</sup> = 513; t<sub>R</sub> = 1.24 min.

685

686 1-(1-Methyl-1H-imidazol-4-ylmethyl)-1H-indole-6-carbonitrile (42)

687

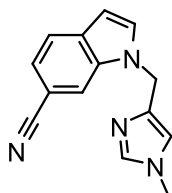

688

689

690 In a 50 mL round-bottom flask 6-cyanoindole (200 mg; 1.337 mmol) is dissolved in  
691 1,3-dimethyl-3,4,5,6-tetrahydro-2(1H)-pyrimidinone (2.0 mL; 16.54 mmol), cooled in an  
692 ice-bath and treated with sodium hydride (55%; 128.3 mg; 2.94 mmol) and stirred at  
693 room temperature for additional 2 h. Tetrabutylammonium iodide (TBAI, 49.37 mg;  
694 0.134 mmol) and 4-(chloromethyl)-1-methyl-1H-imidazole (261.78 mg; 2.005 mmol) are  
695 added to the reaction mixture and stirred overnight at room temperature. Reaction control  
696 showed incomplete 6-cyanoindole consumption and therefore an additional equivalent  
697 sodium hydride and 4-(chloromethyl)-1-methyl-1H-imidazole are added again in two  
698 portions and stirred for additional 32 h. The reaction mixture is quenched by adding  
699 MeOH (2 mL), diluted with water and extracted with EA. The combined organic layer is  
700 dried over MgSO<sub>4</sub>, filtered and evaporated. The crude product is purified by preparative  
701 RP-HPLC using an ACN/water gradient (5-50% ACN) as eluent to yield 1-(1-methyl-  
702 1H-imidazol-4-ylmethyl)-1H-indole-6-carbonitrile (42) (209 mg; 885 μmol; 66.2 %).  
703 LC/MS (BAS1): [M+H]<sup>+</sup> = 237; t<sub>R</sub> = 0.99 min.

704

705 C-[1-(1-Methyl-1H-imidazol-4-ylmethyl)-1H-indol-6-yl]-methylamine (43)

706

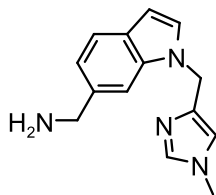

707

708

709 42 (95 mg; 402 μmol) is dissolved in ammonia in MeOH (7N, 3 mL) and  
710 hydrogenated over Raney-Ni (4 mg; 40 μmol) under pressure overnight. After complete  
711 consumption of the starting material the reaction mixture is filtrated, concentrated under  
712 vacuo and purified by preparative RP-HPLC using a MeCN/water (5-50% ACN) gradient  
713 under basic conditions. The product containing fractions are freeze dried to yield unstable  
714 C-[1-(1-Methyl-1H-imidazol-4-ylmethyl)-1H-indol-6-yl]-methylamine (43) (56 mg; 233  
715 μmol; 58 %), which was immediately used for the next reaction step.

716

717 5-Hydroxy-3-[2-({[1-(1-methyl-1H-imidazol-4-ylmethyl)-1H-indol-6-ylmethyl]-  
718 amino}-methyl)-1H-indol-3-yl]-2,3-dihydro-isoindol-1-one (23)  
719

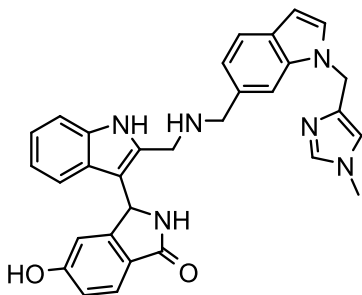

720  
721  
722 In a glass vial 3-(6-hydroxy-3-oxo-isoindolin-1-yl)-1H-indole-2-carbaldehyde (55.0  
723 mg; 179  $\mu\text{mol}$ ) (30) is dissolved in DMF (1.0 ml) and C-[1-(1-methyl-1H-imidazol-4-  
724 ylmethyl)-1H-indol-6-yl]-methylamine (49.4 mg; 206  $\mu\text{mol}$ ) (43) is added. The reaction  
725 mixture is stirred at room temperature for 15 min before sodium triacetoxyborohydride  
726 (190 mg; 895  $\mu\text{mol}$ ) is added and the mixture is stirred at room temperature overnight.  
727 The reaction mixture is diluted with ACN/water 1:1 (200  $\mu\text{L}$ ), filtered through a syringe  
728 filter and purified by preparative RP-HPLC (4B\_0550\_POS) using an ACN/water  
729 gradient under acidic conditions. The product containing fractions are freeze dried to give  
730 5-hydroxy-3-[2-({[1-(1-methyl-1H-imidazol-4-ylmethyl)-1H-indol-6-ylmethyl]-amino}-  
731 methyl)-1H-indol-3-yl]-2,3-dihydro-isoindol-1-one (23) (58 mg; 112  $\mu\text{mol}$ ; 62.8 %).  $^1\text{H}$   
732 (500 MHz,  $\text{DMSO-d}_6$ )  $\delta$  11.15 (s, 1H), 10.09-10.37 (m, 1H), 8.49 (s, 1H), 7.52-7.63 (m,  
733 2H), 7.43-7.51 (m, 2H), 7.26-7.35 (m, 2H), 7.05 (br d,  $J=8.20$  Hz, 1H), 6.97 (ddd,  
734  $J=0.95, 7.09, 8.04$  Hz, 1H), 6.94 (s, 1H), 6.85 (dd,  $J=1.89, 8.20$  Hz, 1H), 6.73 (br t,  
735  $J=7.41$  Hz, 1H), 6.60 (d,  $J=1.89$  Hz, 1H), 6.52-6.58 (m, 1H), 6.36 (d,  $J=3.15$  Hz, 1H),  
736 5.92 (s, 1H), 5.14 (s, 2H), 4.01 (br s, 2H), 3.88 (br s, 2H) 3H under water;  $^{13}\text{C}$  NMR (125  
737 MHz,  $\text{DMSO-d}_6$ )  $\delta$  169.7, 161.0, 151.1, 138.0, 137.9, 136.4, 135.8, 135.8, 132.7, 128.7,  
738 127.3, 125.8, 124.3, 123.5, 121.1, 120.2, 119.9, 118.7, 118.4, 115.8, 111.4, 109.8, 109.6,  
739 108.7, 100.5, 53.0, 52.3, 43.3, 43.2, 32.9; 1 carbon not visible; HRMS (CI<sup>+</sup>): calculated  
740 for  $\text{C}_{31}\text{H}_{28}\text{N}_6\text{O}_2$  (MH<sup>+</sup>) 517.23465, found 517.23460,  $\Delta$  - 0.10 ppm; LC/MS (BAS1):  
741  $[\text{M}+\text{H}]^+ = 517$ ;  $t_{\text{R}} = 1.03$  min.

742 5-Hydroxy-3-[2-({[1-(1-methyl-1H-imidazol-4-ylmethyl)-1H-indol-6-ylmethyl]-  
743 amino}-methyl)-1H-indol-3-yl]-2,3-dihydro-isoindol-1-one (23) (45 mg; 87  $\mu\text{mol}$ ) is  
744 separated via chiral SFC to give BI-2852 (1) (S)-5-Hydroxy-3-[2-({[1-(1-methyl-1H-  
745 imidazol-4-ylmethyl)-1H-indol-6-ylmethyl]-amino}-methyl)-1H-indol-3-yl]-2,3-dihydro-  
746 isoindol-1-one (13 mg; 25  $\mu\text{mol}$ ; > 98% ee) and BI-2853 (44) (R)-5-Hydroxy-3-[2-({[1-  
747 (1-methyl-1H-imidazol-4-ylmethyl)-1H-indol-6-ylmethyl]-amino}-methyl)-1H-indol-3-  
748 yl]-2,3-dihydro-isoindol-1-one (15 mg; 29  $\mu\text{mol}$ ; only 73% ee due to peak tailing).

749 Enantiomeric pure 44 was also produced starting from the enantiomeric pure  
750 aldehyde 3-((R)-6-hydroxy-3-oxo-2,3-dihydro-1H-isoindol-1-yl)-1H-indole-2-  
751 carbaldehyde 31R (30.4 mg; 104  $\mu\text{mol}$ ) via reductive amination with C-[1-(1-Methyl-1H-  
752 imidazol-4-ylmethyl)-1H-indol-6-yl]-methylamine (25 mg; 104  $\mu\text{mol}$ ) (43) giving (R)-5-  
753 Hydroxy-3-[2-({[1-(1-methyl-1H-imidazol-4-ylmethyl)-1H-indol-6-ylmethyl]-amino}-  
754 methyl)-1H-indol-3-yl]-2,3-dihydro-isoindol-1-one (44)(14 mg; 27  $\mu\text{mol}$ ; 26.1 %).

755 1+44: HRMS (CI+): calculated for C<sub>31</sub>H<sub>28</sub>N<sub>6</sub>O<sub>2</sub> (MH<sup>+</sup>) 517.23465, found  
756 517.23525, Δ 1.16 ppm; HRMS (CI+): calculated for C<sub>31</sub>H<sub>28</sub>N<sub>6</sub>O<sub>2</sub> (MH<sup>+</sup>) 517.23465,  
757 found 517.23497, Δ 0.62 ppm; LC/MS (BAS1): [M+H]<sup>+</sup> = 517; t<sub>R</sub> = 1.03 min.  
758

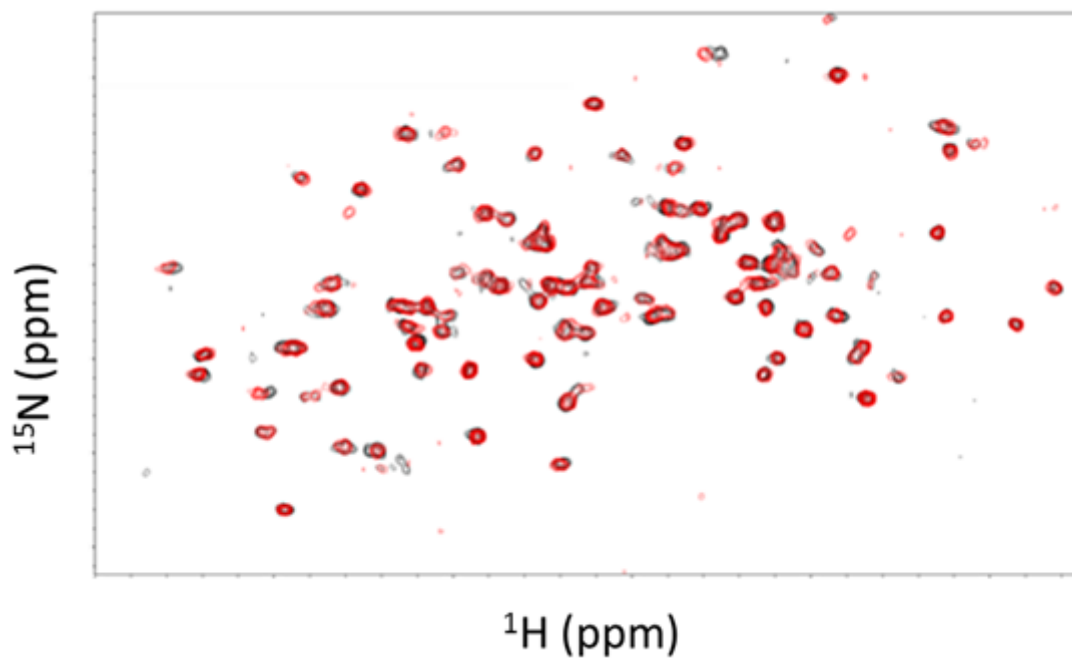

759  
760  
761  
762  
763  
764  
765  
766

**Figure S1. NMR Spectra of Fragment Hit.** Superimpositions of spectra of 50  $\mu\text{M}$  uniformly  $^{15}\text{N}$  labeled GCP-KRAS<sup>G12D</sup> in the absence (black) and presence of 500  $\mu\text{M}$  (2) (red). Assignments of cross peaks experiencing chemical shift perturbations were taken from (Maurer et al. 2012).

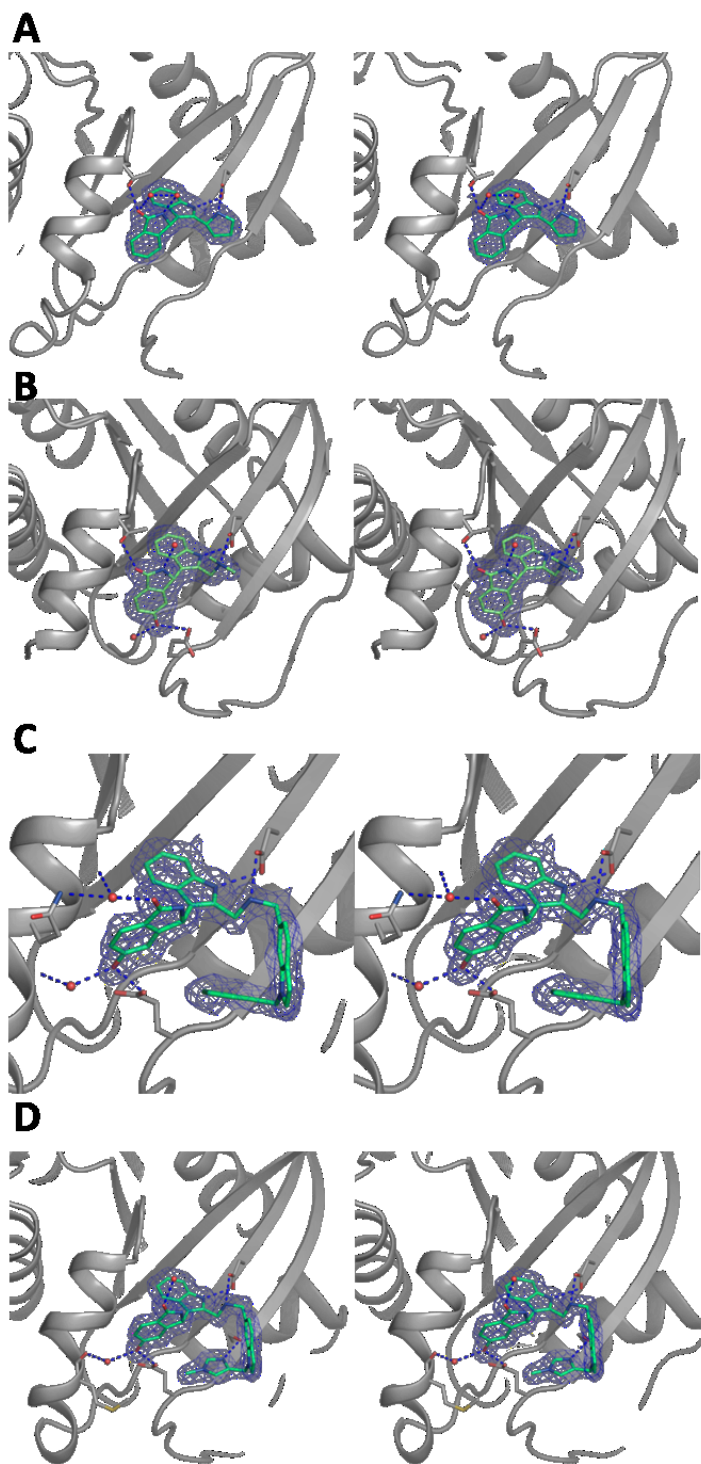

769 **Figure S2. Stereo image of co-crystallized ligands bound to KRAS-G12D (GCP)**  
770 **(wall-eye stereo).** The refined  $2F_o-F_c$  electron density is contoured at  $1 \sigma$  showing the SII  
771 pocket with A) **15**, B) **18** , C) **22** and D) **BI 2852**, each with electron density around  
772 ligand.  
773

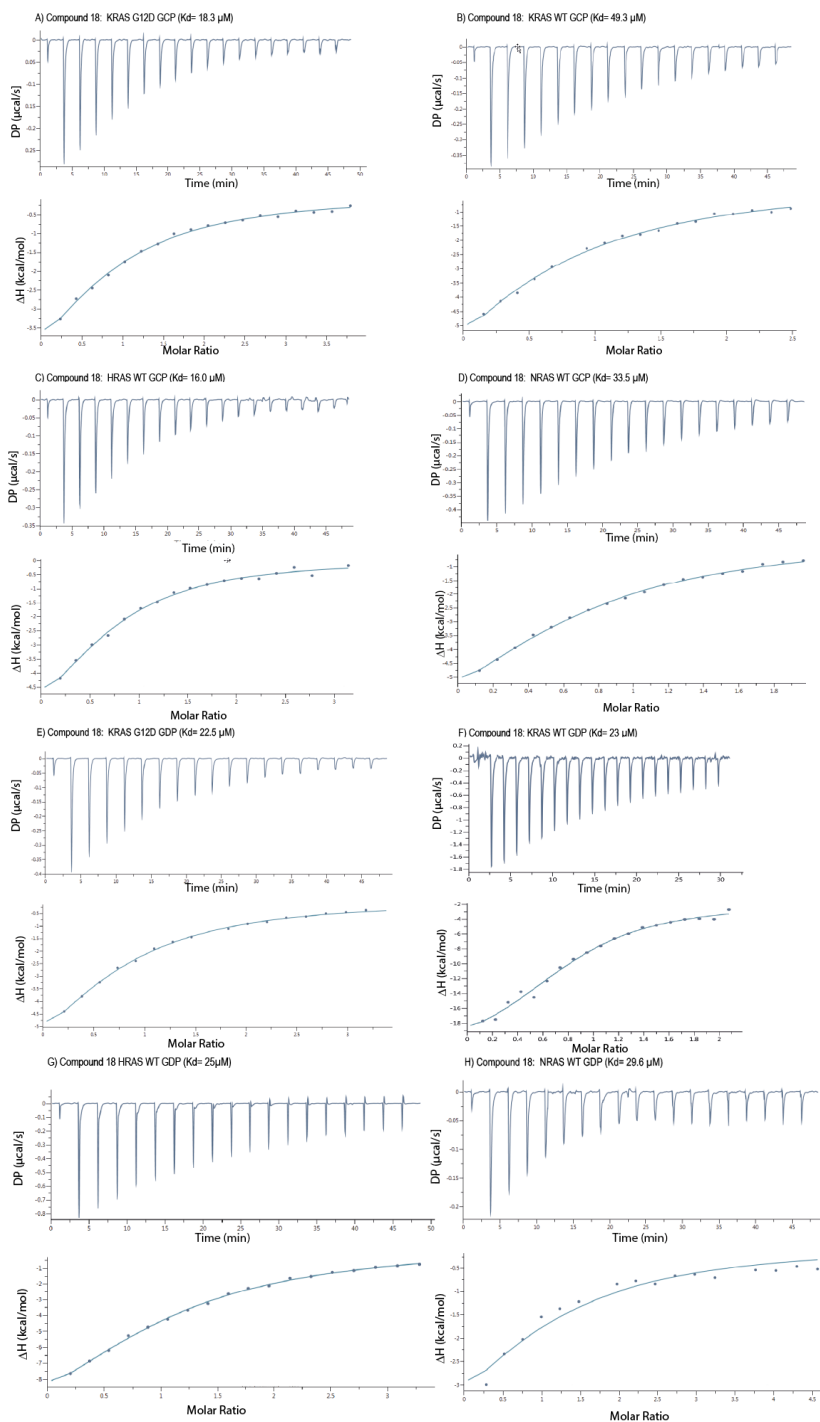

774 **Figure S3. Representative ITC dose response curves for 18 (all measurements were**  
 775 **repeated at least twice).** A) ITC curve for 18 binding to GCP-KRAS<sup>G12D</sup>. B) ITC curve  
 776 for 18 binding to GCP-KRAS<sup>wt</sup> C) ITC curve for 18 binding to GCP-HRAS<sup>wt</sup> D) ITC  
 777 curve for 18 binding to GCP-NRAS<sup>wt</sup> E) ITC curve for 18 binding to GDP-KRAS<sup>G12D</sup> F)  
 778 ITC curve for 18 binding to GDP-KRAS<sup>wt</sup> G) ITC curve for 18 binding to GDP-HRAS<sup>wt</sup>  
 779 ITC curve for 18 binding to GDP-NRAS<sup>wt</sup>.

780



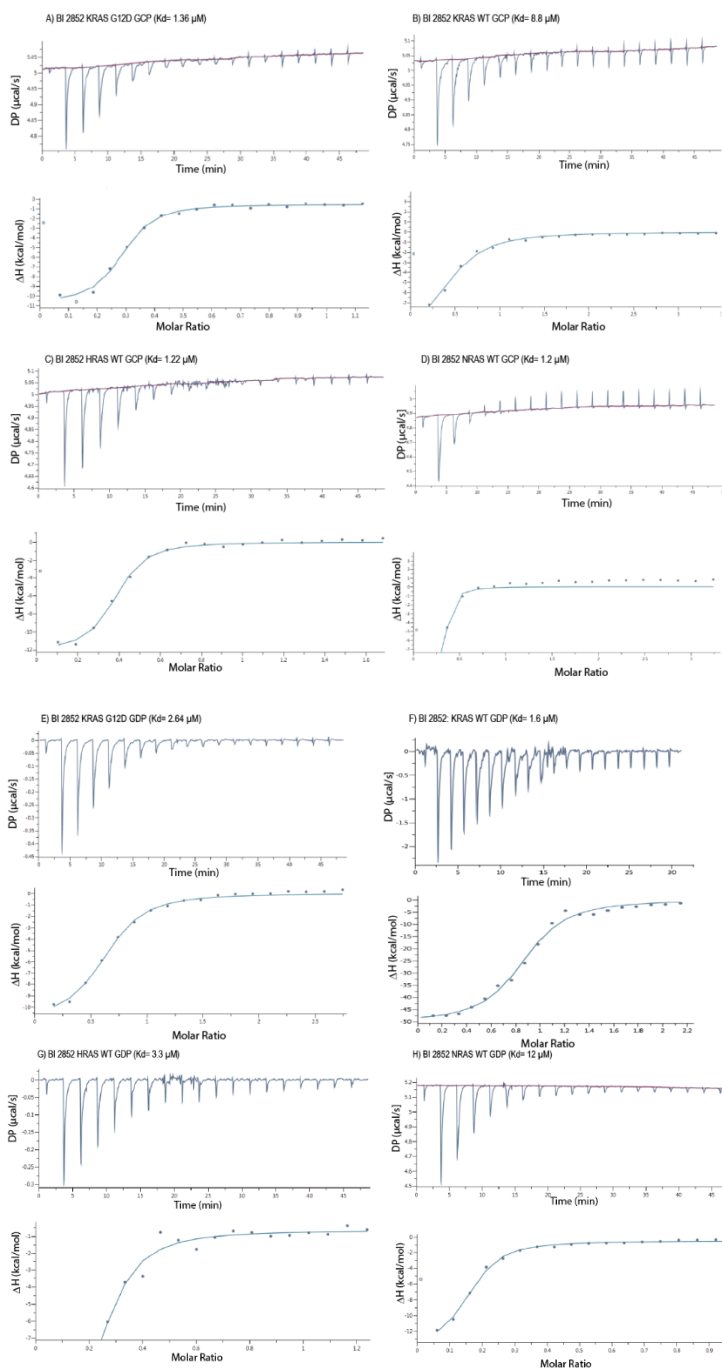

781 **Figure S4. Representative ITC dose response curves for BI-2852 (all measurements**  
 782 **were repeated at least twice).** A) ITC curve for **BI-2852** binding to GCP-KRAS<sup>G12D</sup>. B)  
 783 ITC curve for **BI-2852** binding to GCP-KRAS<sup>wt</sup> C) ITC curve for **BI-2852** binding to  
 784 GCP-HRAS<sup>wt</sup> D) ITC curve for **BI-2852** binding to GCP-NRAS<sup>wt</sup> E) ITC curve for **BI-**  
 785 **2852** binding to GDP-KRAS<sup>G12D</sup> F) ITC curve for **BI-2852** binding to GDP-KRAS<sup>wt</sup> G)  
 786 ITC curve for **BI-2852** binding to GDP-HRAS<sup>wt</sup> H) ITC curve for **BI-2852** binding to  
 787 GDP-NRAS<sup>wt</sup>.

788

789  
790

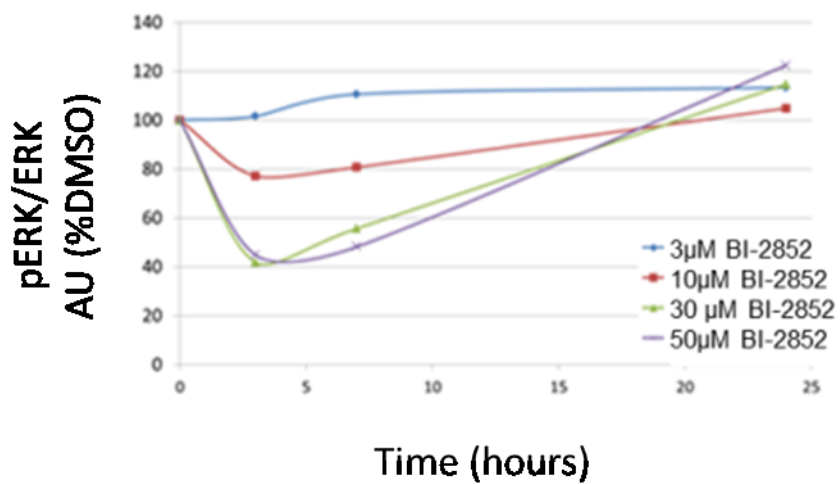

791  
792  
793  
794  
795

**Figure S5. Time course MSD analysis of pERK levels in NCI-H358 cells after treatment of BI-2852.**

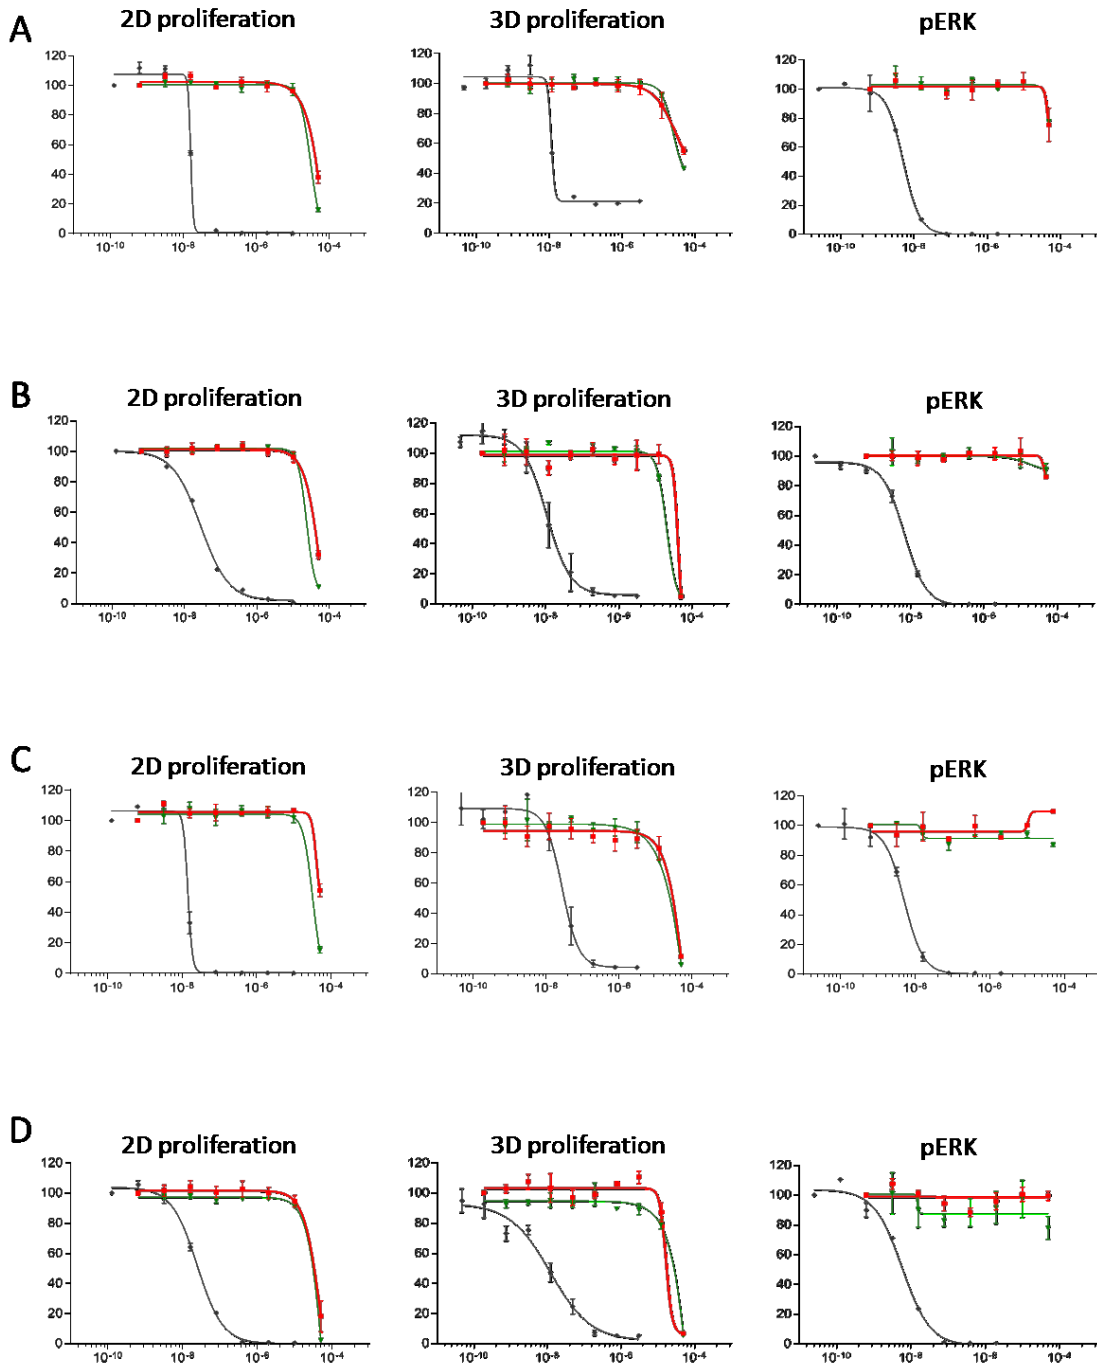

797

798

799

800

801

802

803

804

805

**Figure S6. Effect of BI 2852 on BRAF V600E driven cell lines.** A375 (A), RKO (B), Colo201 (C) and SK-Mel28 (D) cells were tested in three different assays (2D proliferation, 3D proliferation and pERK modulation) in the presence of BI 2852 (red line), compound 44 (green line) and control compounds (black line, Panobinostat in proliferation assays, Trametinib in pERK assay). Error bars indicate standard deviations of duplicates or triplicates (All these experiments have been performed once but as the picture was consistent for all 4 cell lines no further repetition was seen as necessary).

806

807 **Table S1. GCP-KRAS NMR  $K_D$  measurements for 2-Methylaminoindole fragments.**

808

809

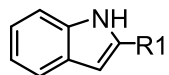

810

811

812

| Compound | R1                                                                                  | $K_D$ T35S GCP [ $\mu$ M] |
|----------|-------------------------------------------------------------------------------------|---------------------------|
| 8        |    | 1300                      |
| 9        |    | 1700                      |
| 10       |    | 2600                      |
| 11       |   | 850                       |
| 12       |  | 820                       |
| 13       |  | 1900                      |
| 14       |  | 1200                      |

813

814

815

816 **Table S2. GCP-KRAS NMR  $K_D$  measurements for Dihydroisoindolinone containing**  
817 **indoles.**

818

819

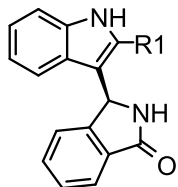

820

821

822

| Compound | R1 | $K_D$ T35S GCP<br>[ $\mu\text{M}$ ] | $K_D$ T35 GCP<br>[ $\mu\text{M}$ ] |
|----------|----|-------------------------------------|------------------------------------|
| 15       |    | 440                                 | 460                                |
| 16       |    | 340                                 | 170                                |
| 17       |    | n.d.                                | 110*                               |

823

824

\*data is for the racemic mixture

825

826 **Table S3. NMR and ITC  $K_D$  measurements for 18.**

| Biophysical Assay                     | $K_D$ [ $\mu$ M] | Number of repeats | Standard deviation |
|---------------------------------------|------------------|-------------------|--------------------|
| $K_D$ (HSQC) GCP-KRAS <sup>G12D</sup> | 17               | 1                 | 6.0 <sup>†</sup>   |
| $K_D$ (HSQC) GDP-KRAS <sup>G12D</sup> | 16               | 1                 | 2.0 <sup>*</sup>   |
| $K_D$ (ITC) GCP-KRAS <sup>G12D</sup>  | 22               | 2                 | 3.4                |
| $K_D$ (ITC) GCP-KRAS <sup>wt</sup>    | 49               | 1                 | --                 |
| $K_D$ (ITC) GCP-HRAS <sup>wt</sup>    | 6.7              | 2                 | 0.5                |
| $K_D$ (ITC) GCP-NRAS <sup>wt</sup>    | 33               | 1                 | --                 |
| $K_D$ (ITC) GDP-KRAS <sup>G12D</sup>  | 29               | 2                 | 6.1                |
| $K_D$ (ITC) GDP-KRAS <sup>wt</sup>    | 15               | 2                 | 7.9                |
| $K_D$ (ITC) GDP-HRAS <sup>wt</sup>    | 54               | 2                 | 5.5                |
| $K_D$ (ITC) GDP-NRAS <sup>wt</sup>    | 33               | 2                 | 3.0                |

827

828 \* Standard deviation for NMR data was obtained from a single  $K_D$  titration with three  
829 different peaks fitted independently.

830

831 **Table S4. Biochemical activity of pendant aminomethyl derivatives.**

832

833

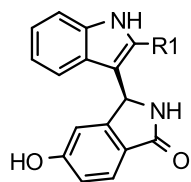

834

835

836

| Compound | R1                                                                                  | IC <sub>50</sub> (FRET) GTP-KRAS <sup>G12D</sup> ::SOS1 [μM] <sup>a</sup> |
|----------|-------------------------------------------------------------------------------------|---------------------------------------------------------------------------|
| 18       |    | 33                                                                        |
| 19       |   | 29                                                                        |
| 20       |  | 7.5                                                                       |
| 21       |  | 5.7                                                                       |
| 22       |  | 0.87                                                                      |

837

838

839

\*All FRET data was performed in duplicate

840

841 **Table S5. ITC  $K_D$  measurements for BI-2852 with GDP and GCP RAS isoforms.**

| <b>ITC Assay</b>                     | <b><math>K_D</math> [<math>\mu</math>M]</b> | <b>Number of repeats</b> | <b>Standard deviation</b> |
|--------------------------------------|---------------------------------------------|--------------------------|---------------------------|
| $K_D$ (ITC) GCP-KRAS <sup>G12D</sup> | 0.74                                        | 3                        | 0.4                       |
| $K_D$ (ITC) GCP-KRAS <sup>wt</sup>   | 7.5                                         | 2                        | 1.4                       |
| $K_D$ (ITC) GCP-HRAS <sup>wt</sup>   | 0.57                                        | 2                        | 0.1                       |
| $K_D$ (ITC) GCP-NRAS <sup>wt</sup>   | 1.3                                         | 2                        | 0.1                       |
| $K_D$ (ITC) GDP-KRAS <sup>G12D</sup> | 2.0                                         | 2                        | 0.7                       |
| $K_D$ (ITC) GDP-KRAS <sup>wt</sup>   | 1.1                                         | 2                        | 0.5                       |
| $K_D$ (ITC) GDP-HRAS <sup>wt</sup>   | 2.5                                         | 2                        | 0.6                       |
| $K_D$ (ITC) GDP-NRAS <sup>wt</sup>   | 8.3                                         | 3                        | 2.7                       |

842

843



844

845 **Table S6. Biochemical Data for BI-2852, 44 and ARS-1620.**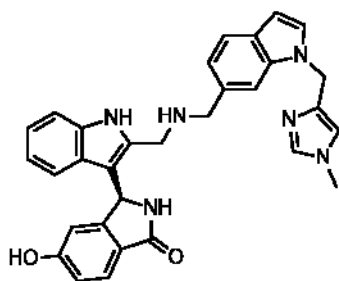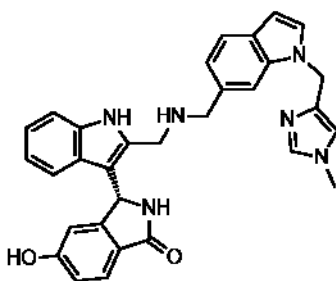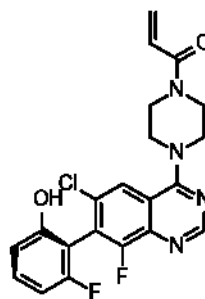

846

847

| Biochemical Assay                                         | BI-2852<br>[nM] | 44 [nM] | ARS 1620<br>[nM] |
|-----------------------------------------------------------|-----------------|---------|------------------|
| IC <sub>50</sub> GDP-KRAS <sup>G12C</sup> ::SOS1          | 450             | 3300    | 590              |
| IC <sub>50</sub> GTP-KRAS <sup>G12C</sup> ::SOS1          | 360             | 1900    | >10000           |
| IC <sub>50</sub> GDP-KRAS <sup>G12D</sup> ::SOS1          | 260             | 2500    | >10000           |
| IC <sub>50</sub> GTP-KRAS <sup>G12D</sup> ::SOS1          | 490             | 4400    | >10000           |
| IC <sub>50</sub> GTP-KRAS <sup>G12C</sup> ::CRAF          | 180             | 590     | >10000           |
| IC <sub>50</sub> GTP-KRAS <sup>G12C</sup> ::PI3K $\alpha$ | 100             | 580     | >10000           |
| IC <sub>50</sub> GTP-KRAS <sup>G12D</sup> ::CRAF          | 770             | ND      | ND               |
| IC <sub>50</sub> GTP-KRAS <sup>G12D</sup> ::PI3K $\alpha$ | 500             | ND      | ND               |
| IC <sub>50</sub> GTP-KRAS <sup>wt</sup> ::SOS1            | 490             | ND      | ND               |
| IC <sub>50</sub> GTP-KRAS <sup>wt</sup> ::CRAF            | 740             | ND      | ND               |
| IC <sub>50</sub> GTP-KRAS <sup>wt</sup> ::PI3K $\alpha$   | 250             | ND      | ND               |

848

849

850

851

852

853

854

855

856

857

858

859

860

861

862

Measurements of the protein-protein interactions of GTP-KRAS and SOS1, CRAF and PI3K $\alpha$  and GDP-KRAS and SOS1 including mutant and wildtype KRAS. Assay format = luminescent oxygen channeling immunoassay. ND = not determined. All measurements are performed in duplicate.

863

864

**Table S7. Crystallographic data collection and refinement statistics (MR)**

|                                                     | <b>6GJ5 (15)</b>       | <b>6GJ6 (18)</b>           | <b>6GJ7 (22)</b>           | <b>6GJ8 (BI 2852)</b>     |
|-----------------------------------------------------|------------------------|----------------------------|----------------------------|---------------------------|
| <b>Data collection</b>                              |                        |                            |                            |                           |
| <b>Resolution Limit defined by</b>                  | XDS                    | STARANISO                  | STARANISO                  | STARANISO                 |
| Space group                                         | P 1 2 <sub>1</sub> 1   | P 63                       | C 2 2 21                   | C 2 2 21                  |
| Cell dimensions<br><i>a, b, c</i> (Å)               | 42.07, 40.04,<br>94.28 | 85.9, 85.9,<br>47.5        | 41.8, 116.67,<br>91.8      | 41.6, 116.84,<br>91.48    |
| $\alpha, \beta, \gamma$ (°)                         | 90.0, 101.14, 90.0     | 90, 90, 120                | 90, 90, 90                 | 90, 90, 90                |
| Resolution (Å)                                      | 1.499                  | 1.761 (1.902) <sup>a</sup> | 1.671 (1.902) <sup>a</sup> | 1.66 (1.7) <sup>a</sup>   |
| <i>R</i> <sub>merge</sub>                           | 7.5                    | 6.6                        | 18.6                       | 3.9                       |
| <i>I</i> / $\sigma$ <i>I</i>                        | 2.7                    | 21.2                       | 9.9                        | 31.9                      |
| Completeness (%)                                    | 99.64                  | 93.27 (100.0) <sup>b</sup> | 78.13 (100.0) <sup>b</sup> | 85.9 (100.0) <sup>b</sup> |
| Redundancy                                          | 4.1                    | 9.5                        | 6.4                        | 5.8                       |
| <b>Refinement</b>                                   |                        |                            |                            |                           |
| Resolution (Å)                                      | 1.499                  | 1.8                        | 1.671                      | 1.66                      |
| No. reflections                                     | 49619                  | 18617                      | 20772                      | 23023                     |
| <i>R</i> <sub>work</sub> / <i>R</i> <sub>free</sub> | 18.43/20.29            | 18.14/20.97                | 22.7/25.7                  | 17.38/20.11               |
| No. atoms                                           |                        |                            |                            |                           |
| Protein                                             | 2651                   | 1297                       | 1325                       | 1382                      |
| Ligands                                             | 114                    | 61                         | 72                         | 72                        |
| Water                                               | 358                    | 142                        | 202                        | 234                       |
| <i>B</i> -factors                                   |                        |                            |                            |                           |
| Protein                                             | 30.45                  | 40.37                      | 19.25                      | 13.79                     |
| Ligand/ion                                          | 23.52                  | 29.49                      | 11.74                      | 8.85                      |
| Water                                               | 40.15                  | 52.73                      | 28.11                      | 27.71                     |
| R.m.s. deviations                                   |                        |                            |                            |                           |
| Bond lengths(Å)/ angles (°)                         | 0.005/1.05             | 0.012/1.51                 | 0.008/1.01                 | 0.013/1.52                |

865

866

867

868

<sup>a</sup> approximate effective resolution in parentheses<sup>b</sup> resulting completeness after STARANISO for spherical / elliptical shells

870

**References**871  
872  
873  
874  
875  
876  
877  
878  
879  
880  
881  
882  
883  
884  
885  
886  
887  
888  
889  
890  
891

1. Jerabek-Willemsen M, Wienken CJ, Braun D, Baaske P, & Duhr S (2011) Molecular interaction studies using microscale thermophoresis. *Assay Drug Dev Technol* 9(4):342-353.
2. Mayer M & Meyer B (1999) Characterization of Ligand Binding by Saturation Transfer Difference NMR Spectroscopy. *Angew Chem Int Ed Engl* 38(12):1784-1788.
3. Ross A & Senn H (2003) Automation of biomolecular NMR screening. *Curr Top Med Chem* 3(1):55-67.
4. Pervushin KV, Wider G, & Wuthrich K (1998) Single Transition-to-single Transition Polarization Transfer (ST2-PT) in [15N,1H]-TROSY. *J Biomol NMR* 12(2):345-348.
5. Eberth A & Ahmadian MR (2009) In vitro GEF and GAP assays. *Curr Protoc Cell Biol* Chapter 14:Unit 14 19.
6. Vonrhein C, *et al.* (2011) Data processing and analysis with the autoPROC toolbox. *Acta Crystallogr D Biol Crystallogr* 67(Pt 4):293-302.
7. Collaborative Computational Project N (1994) The CCP4 suite: programs for protein crystallography. *Acta Crystallogr D Biol Crystallogr* 50(Pt 5):760-763.
8. Emsley P, Lohkamp B, Scott WG, & Cowtan K (2010) Features and development of Coot. *Acta Crystallogr D Biol Crystallogr* 66(Pt 4):486-501.
9. Smart O, *et al.* (2011) Grade (<http://www.globalphasing.com>). Global Phasing Ltd., Cambridge. *United Kingdom*.
10. Chen VB, *et al.* (2010) MolProbity: all-atom structure validation for macromolecular crystallography. *Acta Crystallogr D Biol Crystallogr* 66(Pt 1):12-21.
11. Sun Q, *et al.* (2012) Discovery of small molecules that bind to K-Ras and inhibit Sos-mediated activation. *Angew Chem Int Ed Engl* 51(25):6140-6143.
12. Burns MC, *et al.* (2014) Approach for targeting Ras with small molecules that activate SOS-mediated nucleotide exchange. *Proceedings of the National Academy of Sciences*:201315798.

892

893

**Author Contributions**894  
895  
896  
897  
898  
899  
900  
901  
902  
903  
904  
905  
906  
907  
908  
909  
910  
911  
912  
913  
914

D.B.M., D.K., A.M., M.G., L.J.M wrote the manuscript with input from all authors. S.W.F., A.W., M.P, edited the manuscript. A.M. wrote the synthesis supporting information. D.K. supervised the FBS screening campaigns. A.Z. supervised protein production, ITC experiments and KD determination. G.S. performed protein expression and production, nucleotide exchange. J.S. and Q.S. performed SOS1 catalyzed nucleotide exchange assays. M.M and M.Z. performed the NMR experiments and M.Z. supervised the DSF, MST and NMR measurements of the FBS screening. F.M. performed MST measurements. C.G. and Q.S performed protein preparation and NMR-based fragment screening. D.K., A.Z., B.W. and J.H. were responsible for all ITC experiments. B.W., J.P. and D.K. designed and performed the crystallization experiments. L.J.M and A.M. supervised the chemistry team. L.J.M, A.M., A.G. and A.W. designed molecules and synthetic strategies. D.C., P.G., J.K.-Ö., P.K., S.K., C.P. and Y.S. synthesized the compounds and developed chemistry routes. R.K. performed analytics of compounds synthesized. W.H. performed chiral separation and chiral analysis. C.S. measured HRMS Data to obtain the exact mass for all synthesized compounds. M.G. and M.K. designed biological experiments and supervised the biology team. T.Ge. designed and supervised the biochemical Alpha assays. T.Gm, D.H., S.F., J.S., K.S.and B.S. established and performed biochemical assays. R.S., S.M.-M., L.L. and A.S. established and performed cellular assays. J.R. supervised the DMPK team. M.P. was responsible for the biology strategy. D.B.M. and S.W.F. were responsible for the medicinal chemistry strategy.
